# Supplementary material
Source: PubMed Central journal article supplement (PMC9525640)
Supplement: 41467_2022_33378_MOESM1_ESM.pdf [file 41467_2022_33378_MOESM1_ESM.pdf]

## **Supplementary Text S1: Data sources**

### **COVID-19 Testing Data**

PCR testing for SARS CoV-2 in England is undertaken by hospital and public health laboratories (Pillar 1), as well as by community testing (Pillar 2). Pillar 2 testing was available to anyone with symptoms consistent with COVID-19 (high temperature, new continuous cough, or loss or change in sense of smell or taste), anyone who was a contact of a confirmed case, care home staff and residents, and to those who tested positive using a lateral flow test (LFT). Pillar 1 testing is PCR testing in public health laboratories and NHS hospitals and was available for inpatients and others presenting to secondary care as well as health and care workers.

Data on all positive tests regardless of symptom status (PCR and LFT) and negative PCR tests from Pillar 2 from symptomatic individuals and all Pillar 1 tests with a sample date from 25 November 2020 to 10 March 2022 were identified. Where participants had a positive test within 14 days of another positive, the earliest PCR test was used, but sequencing, genotyping and S-gene target status from later tests was retained. Where tests were on the same day pillar 2 symptomatic tests were retained. Positive and negative tests within 90 days of a previous positive test were excluded and negative tests taken within 21 days after a positive test were excluded. Data were restricted to tests with a valid NHS number so linkage to the vaccination record could be carried out.

Classification of positive samples as Delta and Omicron variants was done using, in order of priority, whole genome sequencing, genotyping and S-gene target status. From sequencing Omicron is VOC-21NOV-01 or VUI-22JAN-01 and Delta is VOC-21APR-02 or VUI-21OCT-01. S-gene target failure as well as genotyping and sequencing data could be used to identify Omicron from 29 November 2021 onward, however from 10 January 2022 Delta was very rare so all samples were assigned as Omicron if no sequencing or genotyping was done.(1) The Delta variant was classified using only sequencing, genotyping and S-gene target non-failure for the periods of 26 April 2021- 23 May 2021 and 22 November 2021 to 3 January 2022, whilst for the period from 24 May to 21 November 2022, all samples were defined as Delta if no sequencing, genotyping or S-gene testing was done. Only those individuals where the variant was classified as Delta or Omicron were retained for analysis. The study period was therefore 26 April 2021 to 3 January 2022 for Delta and 22 November 2022 to 2 February 2022 for Omicron.

### **Vaccination Data**

These testing data were linked to the vaccination histories and demographic characteristics of the populations on 14 March 2022 using The National Immunisation Management System (NIMS) as previously described.(1, 2) Third doses were identified as a 3rd dose given at least 84 days after a second dose and administered after 13 September 2021. Individuals with vaccination histories outside the recommended schedules were excluded from the analysis (Figure S1).

Testing data were linked to NIMS on 14 March 2022 using combinations of the unique individual National Health Service (NHS) number, date of birth, surname, first name, and postcode using deterministic linkage.

### **Emergency Care Hospital Admission Data**

Emergency Care hospital admissions from the Emergency Care Dataset (ECDS), which includes hospital admissions through emergency departments but not elective admissions, were linked using NHS number and date of birth to the testing data on 15 March 2022 to identify admissions within 14 days of a community test. Admissions due to an injury were excluded. Admissions were identified where the Emergency Care Destination code was either discharge to a ward, intensive care unit, coronary care unit, high dependency unit or where there was a date on which the decision to admit the patient was made. Admissions with the reason for attending emergency care being a SNOMED CT (Systematized Nomenclature of Medicine–Clinical Terms) coded acute respiratory illness were flagged.(3)

## **Secondary Care Hospital Admission Data**

Hospital inpatient admissions for a range of acute respiratory illnesses were identified from the Secondary Uses Service (SUS). SUS is the national electronic database of hospital admissions that provides timely updates of ICD-10 codes for completed hospital stays for all NHS hospitals in England. Up to 24 ICD-10 diagnoses fields can be completed in SUS for each admission with the first diagnosis field indicating the primary reason for admission. Oxygen use and ventilation support was ascertained using the Classification of Interventions and Procedures (OPCS-4) codes (table S15). Intensive Care Unit (ICU) admission status was ascertained by the Main Specialty of the ward being Critical Care Medicine or the Treatment Function being Intensive Care Medicine. Length of stay was calculated as date of discharge – date of admission.

For the Pillar 2 samples admissions with an ICD-10 acute respiratory illness discharge diagnosis, in any diagnosis field, were identified where the sample was taken 14 days before and up to 2 days after the day of admission. For the Pillar 1 samples, admissions with an ICD-10 coded respiratory discharge diagnosis in any diagnosis field, were identified where the sample was taken 1 days before and up to 2 days after the admission. The data was restricted to tests up to 23 February 2022 to account for delays in the SUS data recording. Linkage to the testing data was carried out on 15 March 2022 using NHS number and date of birth. Where multiple admissions linked to the same sample date the first admission after the sample date was retained and episode length calculated by summing the stay length for each admission.

Table S1. Descriptive characteristics of positive and negative test results in individuals 18-64 years of age tested for SARS-CoV-2 in England for the study population

| Category                                                                              |                               |                | Delta         |        |               |        | Omicron       |        |               |        |
|---------------------------------------------------------------------------------------|-------------------------------|----------------|---------------|--------|---------------|--------|---------------|--------|---------------|--------|
|                                                                                       |                               |                | Positive      |        | Negative      |        | Positive      |        | Negative      |        |
|                                                                                       |                               |                | n             | %      | n             | %      | n             | %      | n             | %      |
|                                                                                       |                               |                | <b>52,155</b> |        | <b>81,821</b> |        | <b>19,790</b> |        | <b>22,548</b> |        |
| Vaccination Status after vaccine                                                      | Manufacturer (primary course) | Dose           |               |        |               |        |               |        |               |        |
|                                                                                       |                               | Unvaccinated   | 29,877        | 57.3%  | 13,942        | 17.0%  | 5,136         | 26.0%  | 2,822         | 12.5%  |
|                                                                                       | ChAdOx1-S                     | Dose 1         | 1,825         | 3.5%   | 6,180         | 7.6%   | 409           | 2.1%   | 447           | 2.0%   |
|                                                                                       |                               | Dose 2         | 13,385        | 25.7%  | 31,027        | 37.9%  | 2,401         | 12.1%  | 3,930         | 17.4%  |
|                                                                                       |                               | 3rd dose (any) | 368           | 0.7%   | 5,210         | 6.4%   | 4,578         | 23.1%  | 7,310         | 32.4%  |
|                                                                                       | BNT162b2                      | Dose 1         | 2,672         | 5.1%   | 4,014         | 4.9%   | 761           | 3.8%   | 581           | 2.6%   |
|                                                                                       |                               | Dose 2         | 3,548         | 6.8%   | 16,820        | 20.6%  | 2,473         | 12.5%  | 2,807         | 12.4%  |
|                                                                                       |                               | 3rd dose (any) | 235           | 0.5%   | 3,637         | 4.4%   | 3,708         | 18.7%  | 4,280         | 19.0%  |
|                                                                                       | mRNA-1273                     | Dose 1         | 187           | 0.4%   | 387           | 0.5%   | 66            | 0.3%   | 73            | 0.3%   |
|                                                                                       |                               | Dose 2         | 58            | 0.1%   | 572           | 0.7%   | 154           | 0.8%   | 217           | 1.0%   |
| 3rd dose (any)                                                                        |                               | 0              | 0.0%          | 32     | 0.0%          | 104    | 0.5%          | 81     | 0.4%          |        |
| ECDS admissions -pillar 2 symptomatic                                                 |                               |                | 17,232        | 100.0% | 19,461        | 100.0% | 3,519         | 100.0% | 6,432         | 100.0% |
| ECDS admissions -pillar 2 symptomatic with respiratory code                           |                               |                | 9,618         | 55.8%  | 3,070         | 15.8%  | 782           | 22.2%  | 973           | 15.1%  |
| Secondary Uses Service Respiratory coded admissions (SUS)                             |                               |                | 47,550        | 100.0% | 63,781        | 100.0% | 17,075        | 100.0% | 16,527        | 100.0% |
| Secondary Uses Service Respiratory coded admissions (SUS) with 0 days length of stay  |                               |                | 5,766         | 12.1%  | 7,808         | 12.2%  | 5,626         | 32.9%  | 2,333         | 14.1%  |
| SUS with respiratory code but NOT in primary diagnosis field with at least 1 day stay |                               |                | 9,395         | 19.8%  | 29,601        | 46.4%  | 7,469         | 43.7%  | 7,308         | 44.2%  |
| SUS with respiratory code as the primary diagnosis and length of stay >=1 day         |                               |                | 32,389        | 68.1%  | 26,372        | 41.3%  | 3,980         | 23.3%  | 6,886         | 41.7%  |
| SUS with respiratory code as the primary diagnosis and length of stay >=2 days        |                               |                | 28,537        | 60.0%  | 21,834        | 34.2%  | 2,827         | 16.6%  | 5,568         | 33.7%  |
| SUS with respiratory code as the primary diagnosis and length of stay >=3 days        |                               |                | 25,163        | 52.9%  | 18,193        | 28.5%  | 2,110         | 12.4%  | 4,606         | 27.9%  |
| SUS >=2 days stay and primary diagnosis with oxygen use                               |                               |                | 5,866         | 12.3%  | 1,385         | 2.2%   | 222           | 1.3%   | 336           | 2.0%   |
| SUS >=2 days stay and primary diagnosis with oxygen use or ventilation used or in ICU |                               |                | 9,898         | 20.8%  | 2,980         | 4.7%   | 424           | 2.5%   | 729           | 4.4%   |

|                     |                                    |        |       |        |       |        |       |        |       |
|---------------------|------------------------------------|--------|-------|--------|-------|--------|-------|--------|-------|
| Testing route       | Pillar 1                           | 24,007 | 46.0% | 58,249 | 71.2% | 10,457 | 52.8% | 15,055 | 66.8% |
|                     | Pillar 2                           | 28,148 | 54.0% | 23,572 | 28.8% | 9,333  | 47.2% | 7,493  | 33.2% |
| Gender              | Female                             | 27,731 | 53.2% | 43,406 | 53.0% | 13,042 | 65.9% | 12,064 | 53.5% |
|                     | Male                               | 24,338 | 46.7% | 37,772 | 46.2% | 6,717  | 33.9% | 10,317 | 45.8% |
|                     | Missing                            | 86     | 0.2%  | 643    | 0.8%  | 31     | 0.2%  | 167    | 0.7%  |
| Age                 | 18-19                              | 1,024  | 2.0%  | 1,893  | 2.3%  | 545    | 2.8%  | 509    | 2.3%  |
|                     | 20-24                              | 3,507  | 6.7%  | 4,690  | 5.7%  | 1838   | 9.3%  | 1219   | 5.4%  |
|                     | 25-29                              | 5,288  | 10.1% | 5,515  | 6.7%  | 2586   | 13.1% | 1,588  | 7.0%  |
|                     | 30-34                              | 6,479  | 12.4% | 6,607  | 8.1%  | 2872   | 14.5% | 1,908  | 8.5%  |
|                     | 35-39                              | 6,276  | 12.0% | 6,683  | 8.2%  | 2263   | 11.4% | 1,960  | 8.7%  |
|                     | 40-44                              | 5,797  | 11.1% | 6,789  | 8.3%  | 2000   | 10.1% | 1,805  | 8.0%  |
|                     | 45-49                              | 5,611  | 10.8% | 7,980  | 9.8%  | 1714   | 8.7%  | 2,172  | 9.6%  |
|                     | 50-54                              | 6,153  | 11.8% | 11,059 | 13.5% | 1955   | 9.9%  | 3,024  | 13.4% |
|                     | 55-59                              | 6,281  | 12.0% | 14,123 | 17.3% | 2035   | 10.3% | 3,833  | 17.0% |
|                     | 60-64                              | 5,739  | 11.0% | 16,482 | 20.1% | 1982   | 10.0% | 4,530  | 20.1% |
| Ethnicity           | Missing                            | 3,714  | 7.1%  | 3,938  | 4.8%  | 1,074  | 5.4%  | 1,182  | 5.2%  |
|                     | African                            | 1,597  | 3.1%  | 1,529  | 1.9%  | 606    | 3.1%  | 378    | 1.7%  |
|                     | Any other Asian background         | 1136   | 2.2%  | 1,240  | 1.5%  | 397    | 2.0%  | 324    | 1.4%  |
|                     | Any other Black background         | 869    | 1.7%  | 735    | 0.9%  | 224    | 1.1%  | 175    | 0.8%  |
|                     | Any other White background         | 5,296  | 10.2% | 5,160  | 6.3%  | 1,845  | 9.3%  | 1,407  | 6.2%  |
|                     | Any other ethnic group             | 1,669  | 3.2%  | 1,460  | 1.8%  | 608    | 3.1%  | 415    | 1.8%  |
|                     | Any other mixed background         | 501    | 1.0%  | 467    | 0.6%  | 173    | 0.9%  | 113    | 0.5%  |
|                     | Bangladeshi or British Bangladeshi | 731    | 1.4%  | 636    | 0.8%  | 250    | 1.3%  | 147    | 0.7%  |
|                     | British, Mixed British             | 30,215 | 57.9% | 60,081 | 73.4% | 12455  | 62.9% | 16661  | 73.9% |
|                     | Caribbean                          | 1,356  | 2.6%  | 857    | 1.0%  | 289    | 1.5%  | 206    | 0.9%  |
|                     | Chinese                            | 245    | 0.5%  | 184    | 0.2%  | 60     | 0.3%  | 71     | 0.3%  |
|                     | Indian or British Indian           | 1,522  | 2.9%  | 2,245  | 2.7%  | 646    | 3.3%  | 616    | 2.7%  |
|                     | Irish                              | 208    | 0.4%  | 590    | 0.7%  | 117    | 0.6%  | 157    | 0.7%  |
|                     | Pakistani or British Pakistani     | 2,360  | 4.5%  | 2,006  | 2.5%  | 786    | 4.0%  | 528    | 2.3%  |
|                     | White and Asian                    | 181    | 0.3%  | 184    | 0.2%  | 69     | 0.3%  | 45     | 0.2%  |
|                     | White and Black African            | 191    | 0.4%  | 188    | 0.2%  | 66     | 0.3%  | 55     | 0.2%  |
|                     | White and Black Caribbean          | 364    | 0.7%  | 321    | 0.4%  | 125    | 0.6%  | 68     | 0.3%  |
| NHS Region          | East of England                    | 4,507  | 8.6%  | 7,886  | 9.6%  | 1,799  | 9.1%  | 2,067  | 9.2%  |
|                     | London                             | 8,343  | 16.0% | 10,895 | 13.3% | 3,314  | 16.7% | 2,703  | 12.0% |
|                     | Midlands                           | 11,370 | 21.8% | 17,289 | 21.1% | 4,160  | 21.0% | 5,060  | 22.4% |
|                     | North East                         | 9,393  | 18.0% | 13,400 | 16.4% | 3,260  | 16.5% | 3,813  | 16.9% |
|                     | North West                         | 8,423  | 16.1% | 13,772 | 16.8% | 3,104  | 15.7% | 3,669  | 16.3% |
|                     | South East                         | 5,463  | 10.5% | 11,085 | 13.5% | 2609   | 13.2% | 3,146  | 14.0% |
|                     | South West                         | 4,656  | 8.9%  | 7,494  | 9.2%  | 1544   | 7.8%  | 2,090  | 9.3%  |
| IMD Quintiles       | 1                                  | 16,559 | 31.7% | 24,343 | 29.8% | 6,103  | 30.8% | 6,675  | 29.6% |
|                     | 2                                  | 12,173 | 23.3% | 18,626 | 22.8% | 4,503  | 22.8% | 5,061  | 22.4% |
|                     | 3                                  | 9,193  | 17.6% | 14,926 | 18.2% | 3,600  | 18.2% | 4,182  | 18.5% |
|                     | 4                                  | 7,621  | 14.6% | 12,983 | 15.9% | 2,930  | 14.8% | 3,697  | 16.4% |
|                     | 5                                  | 6,259  | 12.0% | 10,408 | 12.7% | 2,552  | 12.9% | 2,836  | 12.6% |
|                     | Missing                            | 350    | 0.7%  | 535    | 0.7%  | 102    | 0.5%  | 97     | 0.4%  |
| Previously positive | No                                 | 51,292 | 98.3% | 71,560 | 87.5% | 17,583 | 88.8% | 18,748 | 83.1% |
|                     | Yes                                | 863    | 1.7%  | 10,261 | 12.5% | 2,207  | 11.2% | 3,800  | 16.9% |

|                                        |                           |        |       |        |       |       |       |        |       |
|----------------------------------------|---------------------------|--------|-------|--------|-------|-------|-------|--------|-------|
| <b>Vaccine<br/>priority<br/>groups</b> | Healthcare worker         | 1,354  | 2.6%  | 3,216  | 3.9%  | 1,098 | 5.5%  | 939    | 4.2%  |
|                                        | CEV                       | 8,311  | 15.9% | 24,526 | 30.0% | 5,123 | 25.9% | 6,245  | 27.7% |
|                                        | At risk                   | 22,997 | 44.1% | 51,771 | 63.3% | 9,967 | 50.4% | 13,907 | 61.7% |
|                                        | Severely immunosuppressed | 1,458  | 2.8%  | 4,939  | 6.0%  | 1,550 | 7.8%  | 1,352  | 6.0%  |

Table S2: Descriptive characteristics of positive and negative test results in individuals 65 years of age and over tested for SARS-CoV-2 in England for the study population

| Category                                                                              |                                      |                | Delta         |        |                |        | Omicron       |        |               |        |
|---------------------------------------------------------------------------------------|--------------------------------------|----------------|---------------|--------|----------------|--------|---------------|--------|---------------|--------|
|                                                                                       |                                      |                | Positive      |        | Negative       |        | Positive      |        | Negative      |        |
|                                                                                       |                                      |                | n             | %      | n              | %      | n             | %      | n             | %      |
| <b>Category</b>                                                                       |                                      |                | <b>30,427</b> |        | <b>187,463</b> |        | <b>13,348</b> |        | <b>49,643</b> |        |
| <b>Vaccination Status after vaccine</b>                                               | <b>Manufacturer (primary course)</b> | <b>Dose</b>    |               |        |                |        |               |        |               |        |
|                                                                                       |                                      | Unvaccinated   | 5,033         | 16.5%  | 6676           | 3.3%   | 1452          | 1.1%   | 1462          | 3%     |
|                                                                                       | ChAdOx1-S                            | Dose 1         | 590           | 1.9%   | 5,399          | 2.7%   | 153           | 9.7%   | 331           | 1%     |
|                                                                                       |                                      | Dose 2         | 14073         | 46.3%  | 70923          | 35.0%  | 1295          | 35.1%  | 4057          | 8%     |
|                                                                                       |                                      | 3rd dose (any) | 921           | 3.0%   | 19693          | 9.7%   | 4679          | 1.0%   | 20015         | 40%    |
|                                                                                       | BNT162b2                             | Dose 1         | 336           | 1.1%   | 2237           | 1.1%   | 133           | 4.5%   | 256           | 1%     |
|                                                                                       |                                      | Dose 2         | 8270          | 27.2%  | 58131          | 28.7%  | 607           | 37.6%  | 2275          | 5%     |
|                                                                                       |                                      | 3rd dose (any) | 1197          | 3.9%   | 24358          | 12.0%  | 5016          | 0.1%   | 21227         | 43%    |
|                                                                                       | mRNA-1273                            | Dose 1         | 6             | 0.0%   | 30             | 0.0%   | 11            | 0.0%   | 11            | 0%     |
|                                                                                       |                                      | Dose 2         | 1             | 0.0%   | 15             | 0.0%   | 2             | 0.0%   | 8             | 0%     |
| 3rd dose (any)                                                                        |                                      | 0              | 0.0%          | 1      | 0.0%           | 0      | 8.8%          | 1      | 0%            |        |
| ECDS admissions -pillar 2 symptomatic                                                 |                                      |                | 5,331         | 100.0% | 6,059          | 100.0% | 1174          | 100.0% | 2,317         | 100.0% |
| ECDS admissions -pillar 2 symptomatic with respiratory code                           |                                      |                | 3,170         | 59.5%  | 1,559          | 25.7%  | 467           | 39.8%  | 547           | 23.6%  |
| Secondary Uses Service Respiratory coded admissions (SUS)                             |                                      |                | 29,596        | 100.0% | 183,108        | 100.0% | 12,250        | 100.0% | 47,931        | 100.0% |
| Secondary Uses Service Respiratory coded admissions (SUS) with 0 days length of stay  |                                      |                | 989           | 3.3%   | 6,450          | 3.5%   | 1,393         | 11.4%  | 2,121         | 4.4%   |
| SUS with respiratory code but NOT in primary diagnosis field with at least 1 day stay |                                      |                | 5,446         | 18.4%  | 82,963         | 45.3%  | 4,704         | 38.4%  | 20,067        | 41.9%  |
| SUS with respiratory code as the primary diagnosis and length of stay >=1 day         |                                      |                | 23,161        | 78.3%  | 93,695         | 51.2%  | 6,153         | 50.2%  | 25,743        | 53.7%  |
| SUS with respiratory code as the primary diagnosis and length of stay >=2 days        |                                      |                | 21,808        | 73.7%  | 85,806         | 46.9%  | 5,565         | 45.4%  | 23,257        | 48.5%  |
| SUS with respiratory code as the primary diagnosis and length of stay >=3 days        |                                      |                | 20,271        | 68.5%  | 77,998         | 42.6%  | 5,019         | 41.0%  | 20,796        | 43.4%  |
| SUS >=2 days stay and primary diagnosis with oxygen use                               |                                      |                | 3,625         | 12.2%  | 4,092          | 2.2%   | 517           | 4.2%   | 1,155         | 2.4%   |
| SUS >=2 days stay and primary diagnosis with oxygen use or ventilation used or in ICU |                                      |                | 6,265         | 21.2%  | 7,146          | 3.9%   | 807           | 6.6%   | 1,921         | 4.0%   |
| <b>Testing route</b>                                                                  | Pillar 1                             |                | 20,659        | 67.9%  | 179,756        | 95.9%  | 9,482         | 71.0%  | 46,858        | 94.4%  |
|                                                                                       | Pillar 2                             |                | 9,768         | 32.1%  | 7,707          | 4.1%   | 3,866         | 29.0%  | 2,785         | 5.6%   |

|                                |                                    |        |       |         |       |        |       |        |       |
|--------------------------------|------------------------------------|--------|-------|---------|-------|--------|-------|--------|-------|
| <b>Gender</b>                  | Female                             | 13,739 | 45.2% | 94,863  | 50.6% | 6,379  | 47.8% | 25,660 | 51.7% |
|                                | Male                               | 16,668 | 54.8% | 91,485  | 48.8% | 6,947  | 52.0% | 23,756 | 47.9% |
|                                | Missing                            | 20     | 0.1%  | 1,115   | 0.6%  | 22     | 0.2%  | 227    | 0.5%  |
| <b>Age</b>                     | 65-69                              | 5,515  | 18.1% | 19,569  | 10.4% | 1,932  | 14.5% | 5,375  | 10.8% |
|                                | 70-74                              | 6,456  | 21.2% | 28,250  | 15.1% | 2,368  | 17.7% | 7,556  | 15.2% |
|                                | 75-79                              | 6,021  | 19.8% | 33,227  | 17.7% | 2,540  | 19.0% | 8,899  | 17.9% |
|                                | 80-84                              | 5,296  | 17.4% | 36,800  | 19.6% | 2,534  | 19.0% | 9,906  | 20.0% |
|                                | 85-89                              | 4,255  | 14.0% | 36,298  | 19.4% | 2,251  | 16.9% | 9,571  | 19.3% |
|                                | >=90                               | 2,884  | 9.5%  | 33,319  | 17.8% | 1,723  | 12.9% | 8,336  | 16.8% |
| <b>Ethnicity</b>               | Missing                            | 1,412  | 4.6%  | 7,838   | 4.2%  | 579    | 4.3%  | 2,221  | 4.5%  |
|                                | African                            | 238    | 0.8%  | 597     | 0.3%  | 105    | 0.8%  | 131    | 0.3%  |
|                                | Any other Asian background         | 308    | 1.0%  | 1,165   | 0.6%  | 134    | 1.0%  | 294    | 0.6%  |
|                                | Any other Black background         | 152    | 0.5%  | 298     | 0.2%  | 50     | 0.4%  | 79     | 0.2%  |
|                                | Any other White background         | 1,559  | 5.1%  | 8,230   | 4.4%  | 684    | 5.1%  | 2,163  | 4.4%  |
|                                | Any other ethnic group             | 354    | 1.2%  | 1,297   | 0.7%  | 145    | 1.1%  | 314    | 0.6%  |
|                                | Any other mixed background         | 79     | 0.3%  | 469     | 0.3%  | 41     | 0.3%  | 102    | 0.2%  |
|                                | Bangladeshi or British Bangladeshi | 207    | 0.7%  | 518     | 0.3%  | 68     | 0.5%  | 114    | 0.2%  |
|                                | British, Mixed British             | 23,386 | 76.9% | 158,305 | 84.4% | 10,445 | 78.3% | 42,004 | 84.6% |
|                                | Caribbean                          | 645    | 2.1%  | 1,179   | 0.6%  | 248    | 1.9%  | 273    | 0.5%  |
|                                | Chinese                            | 92     | 0.3%  | 244     | 0.1%  | 32     | 0.2%  | 57     | 0.1%  |
|                                | Indian or British Indian           | 797    | 2.6%  | 2,941   | 1.6%  | 292    | 2.2%  | 798    | 1.6%  |
|                                | Irish                              | 317    | 1.0%  | 2,370   | 1.3%  | 186    | 1.4%  | 585    | 1.2%  |
|                                | Pakistani or British Pakistani     | 740    | 2.4%  | 1,671   | 0.9%  | 296    | 2.2%  | 428    | 0.9%  |
|                                | White and Asian                    | 37     | 0.1%  | 109     | 0.1%  | 9      | 0.1%  | 26     | 0.1%  |
|                                | White and Black African            | 24     | 0.1%  | 79      | 0.0%  | 5      | 0.0%  | 20     | 0.0%  |
|                                | White and Black Caribbean          | 80     | 0.3%  | 153     | 0.1%  | 29     | 0.2%  | 34     | 0.1%  |
| <b>-NHS Region</b>             | East of England                    | 2,666  | 8.8%  | 20,728  | 11.1% | 1,227  | 9.2%  | 5,013  | 10.1% |
|                                | London                             | 3,670  | 12.1% | 20,657  | 11.0% | 1,952  | 14.6% | 4,858  | 9.8%  |
|                                | Midlands                           | 6,224  | 20.5% | 37,399  | 20.0% | 2,643  | 19.8% | 11,046 | 22.3% |
|                                | North East                         | 6,832  | 22.5% | 29,448  | 15.7% | 2,501  | 18.7% | 8,136  | 16.4% |
|                                | North West                         | 4,838  | 15.9% | 28,624  | 15.3% | 2,180  | 16.3% | 7,386  | 14.9% |
|                                | South East                         | 3,305  | 10.9% | 30,103  | 16.1% | 1,859  | 13.9% | 7,909  | 15.9% |
|                                | South West                         | 2,892  | 9.5%  | 20,504  | 10.9% | 986    | 7.4%  | 5,295  | 10.7% |
| <b>IMD Quintiles</b>           | 1                                  | 8,146  | 26.8% | 37,552  | 20.0% | 3,379  | 25.3% | 9,855  | 19.9% |
|                                | 2                                  | 6,581  | 21.6% | 37,515  | 20.0% | 2,726  | 20.4% | 9,933  | 20.0% |
|                                | 3                                  | 5,734  | 18.8% | 38,002  | 20.3% | 2,626  | 19.7% | 10,023 | 20.2% |
|                                | 4                                  | 5,457  | 17.9% | 38,607  | 20.6% | 2,423  | 18.2% | 10,333 | 20.8% |
|                                | 5                                  | 4,441  | 14.6% | 35,434  | 18.9% | 2,165  | 16.2% | 9,420  | 19.0% |
|                                | Missing                            | 68     | 0.2%  | 353     | 0.2%  | 29     | 0.2%  | 79     | 0.2%  |
| <b>Previously positive</b>     | No                                 | 29,963 | 41.6% | 171,099 | 23.9% | 12,649 | 94.8% | 44,761 | 90.2% |
|                                | Yes                                | 464    | 2.3%  | 16,364  | 2.6%  | 699    | 5.2%  | 4,882  | 9.8%  |
| <b>Vaccine priority groups</b> | Healthcare worker                  | 63     | 0.2%  | 262     | 0.1%  | 30     | 0.2%  | 74     | 0.1%  |
|                                | CEV                                | 13,802 | 45.4% | 98,148  | 52.4% | 7,054  | 52.8% | 24,200 | 48.7% |
|                                | Severely immunosuppressed          | 1,893  | 6.2%  | 11,918  | 6.4%  | 1,434  | 10.7% | 3,598  | 7.2%  |

Table S3: Vaccine effectiveness (and 95% CI) at least 7 days after the third dose of COVID-19 vaccine using ECDS and secondary care hospital admission data by the Delta and Omicron variants by age group

| Age 18-64                                              | Omicron |          |                                | Delta  |          |                                |
|--------------------------------------------------------|---------|----------|--------------------------------|--------|----------|--------------------------------|
| Outcome                                                | cases   | controls | VE $\geq 7$ days post 3rd dose | cases  | controls | VE $\geq 7$ days post 3rd dose |
| P2s all cases and controls                             | 713,260 | 827,973  | 61.9 (61.5 to 62.3)            | 18,686 | 560,146  | 94.2 (94.1 to 94.3)            |
| P2s ECDS (all controls)                                | 1,472   | 827,973  | 80.0 (77.8 to 82.0)            | 115    | 560,146  | 99.1 (98.9 to 99.3)            |
| P2s ECDS (ECDS controls)                               | 1,472   | 3,268    | 75.9 (71.7 to 79.5)            | 115    | 2,167    | 98.7 (98.4 to 99.0)            |
| P2s ECDS respiratory coded (all controls)              | 323     | 827,973  | 86.9 (83.8 to 89.4)            | 54     | 560,146  | 99.4 (99.2 to 99.5)            |
| P2s ECDS respiratory coded (ECDS respiratory controls) | 323     | 479      | 87.4 (80.8 to 91.8)            | 54     | 361      | 99.3 (99.0 to 99.5)            |
| P1/2 SUS respiratory coded 0 days                      | 3,291   | 1,061    | 63.9 (55.0 to 71.1)            | 36     | 740      | 93.6 (90.6 to 95.7)            |
| P1/2 SUS 1+ days Not Primary                           | 2,201   | 3,408    | 55.2 (48.9 to 60.7)            | 63     | 2,425    | 87.3 (83.0 to 90.5)            |
| P1/2 SUS 1+ days Primary                               | 1,436   | 3,462    | 82.3 (79.3 to 84.9)            | 192    | 2,658    | 96.4 (95.6 to 97.0)            |
| P1/2 SUS 2+ days Primary                               | 921     | 2,834    | 84.5 (81.5 to 87.1)            | 173    | 2,209    | 96.3 (95.5 to 97.0)            |
| P1/2 SUS 3+ days Primary                               | 640     | 2,337    | 86.1 (83.0 to 88.6)            | 154    | 1,859    | 96.4 (95.5 to 97.1)            |
| P1/2 SUS 2+ days Primary & oxygen                      | 46      | 168      | 93.9 (85.0 to 97.5)            | 42     | 133      | 94.4 (89.8 to 96.9)            |
| P1/2 SUS 2+ days Primary & oxygen, ventilation, or ICU | 87      | 368      | 94.0 (89.3 to 96.6)            | 67     | 297      | 93.9 (90.7 to 96.1)            |
| Age 65+                                                | Omicron |          |                                | Delta  |          |                                |
| Outcome                                                | cases   | controls | VE $\geq 7$ days post 3rd dose | cases  | controls | VE $\geq 7$ days post 3rd dose |
| P2s all cases and controls                             | 102,720 | 137,812  | 52.3 (48.3 to 55.9)            | 7,384  | 130,830  | 91.1 (90.6 to 91.6)            |
| P2s ECDS (all controls)                                | 908     | 137,812  | 91.3 (88.9 to 93.1)            | 203    | 130,830  | 98.8 (98.6 to 99)              |
| P2s ECDS (ECDS controls)                               | 908     | 2,034    | 85.7 (77.5 to 90.9)            | 203    | 1,941    | 98.4 (97.8 to 98.8)            |
| P2s ECDS respiratory coded (all controls)              | 358     | 137,812  | 93.4 (90.6 to 95.3)            | 105    | 130,830  | 99.1 (98.8 to 99.3)            |
| P2s ECDS respiratory coded (ECDS respiratory controls) | 358     | 481      | 95.2 (87.0 to 98.2)            | 105    | 521      | 98.6 (97.7 to 99.2)            |
| P1/2 SUS 0 days                                        | 1,203   | 1,778    | 71.6 (54.4 to 82.3)            | 50     | 1,568    | 88.4 (81.6 to 92.6)            |
| P1/2 SUS 1+ days Not Primary                           | 3,595   | 16,111   | 62.0 (54.8 to 68)              | 318    | 15,966   | 81.4 (77.7 to 84.4)            |
| P1/2 SUS 1+ days Primary                               | 3,934   | 20,822   | 87.7 (85.9 to 89.3)            | 981    | 21,215   | 94.5 (93.9 to 95.0)            |
| P1/2 SUS 2+ days Primary                               | 3,501   | 18,765   | 88.3 (86.4 to 89.9)            | 913    | 19,259   | 94.5 (93.8 to 95.0)            |
| P1/2 SUS 3+ days Primary                               | 3,109   | 16,702   | 88.7 (86.8 to 90.4)            | 847    | 17,266   | 94.3 (93.6 to 94.9)            |



|                                                                           |     |       |                     |     |       |                     |
|---------------------------------------------------------------------------|-----|-------|---------------------|-----|-------|---------------------|
| <b>P1/2 SUS 2+ days<br/>Primary &amp; oxygen</b>                          | 287 | 913   | 93.3 (88.2 to 96.2) | 145 | 997   | 96.2 (94.6 to 97.4) |
| <b>P1/2 SUS 2+ days<br/>Primary &amp; oxygen,<br/>ventilation, or ICU</b> | 451 | 1,516 | 92.5 (88.5 to 95.1) | 247 | 1,642 | 95.9 (94.7 to 96.9) |

*P2s: Pillar 2 symptomatic*

*P1/2: Pillar 1 and 2*

*ECDS: Emergency Care Dataset -administrative data from emergency departments. SUS: Secondary Users Service -administrative data from all secondary care which is coded on discharge.*

*ECDS All: All admissions through emergency care; ECDS Resp Coded: Respiratory SNOMED coded admission through emergency care;*

*SUS All: Admitted with a respiratory ICD code; SUS Not Primary: Admitted with a respiratory ICD code not in the primary diagnosis field; SUS Primary: Admitted with a respiratory ICD code in the primary diagnosis field.*

*0 days, 1+ days, 2+ days, 3+ days: Length of stay, for example 1+ means at least one overnight stay*

*Vaccine effectiveness estimates are adjusted using sex, index of multiple deprivation (quintile), ethnic group, care home residence status (for age 65+), geographic region (NHS region), period (calendar week of test), health and social care worker status (for age <65), clinical risk group status (for age <65), clinically extremely vulnerable, severely immunosuppressed, and previously testing positive*

Table S4: Vaccine effectiveness (95% CI) against different hospitalisation outcomes with Delta by dose and interval (all vaccines combined)

|          |        | P2s ECDS<br>(ECDS<br>controls) | P2s ECDS<br>respiratory<br>coded<br>(ECDS<br>respiratory<br>controls) | P1/2 SUS<br>0 days  | P1/2 SUS 1+<br>days Not<br>Primary | P1/2 SUS 1+<br>days Primary | P1/2 SUS 2+<br>days Primary | P1/2 SUS<br>3+ days<br>Primary | P1/2 SUS<br>2+ days<br>Primary &<br>oxygen | P1/2 SUS 2+<br>days Primary<br>& oxygen,<br>ventilation,<br>or ICU |
|----------|--------|--------------------------------|-----------------------------------------------------------------------|---------------------|------------------------------------|-----------------------------|-----------------------------|--------------------------------|--------------------------------------------|--------------------------------------------------------------------|
|          |        | <b>18-64</b>                   |                                                                       |                     |                                    |                             |                             |                                |                                            |                                                                    |
| Dose 1   | 0-27   | 67.1 (61.8 to 71.6)            | 69.6 (58.4 to 77.7)                                                   | 35.8 (14.8 to 51.6) | 40.3 (24.8 to 52.6)                | 44.7 (34.3 to 53.5)         | 43.5 (31.1 to 53.6)         | 46.3 (32.8 to 57.1)            | 41.4 (-14.8 to 70.1)                       | 51.0 (18.7 to 70.4)                                                |
|          | 28+    | 85 (83.4 to 86.5)              | 89.2 (86.6 to 91.4)                                                   | 65.1 (59.0 to 70.3) | 54.7 (49.5 to 59.3)                | 82.7 (81.0 to 84.3)         | 82.7 (80.8 to 84.4)         | 83.0 (80.9 to 84.8)            | 83.3 (76.7 to 88.0)                        | 82.7 (78.0 to 86.4)                                                |
| Dose 2   | 0-13   | 92.8 (91.3 to 94.1)            | 94.6 (92.0 to 96.4)                                                   | 83.4 (76.9 to 88.1) | 63.2 (51.6 to 72.0)                | 90.5 (88.1 to 92.5)         | 90.8 (88.0 to 92.9)         | 91.1 (88.2 to 93.3)            | 80.0 (55.7 to 91.0)                        | 85.0 (73.0 to 91.7)                                                |
|          | 14-174 | 93.1 (92.5 to 93.6)            | 95.0 (94.1 to 95.8)                                                   | 82.5 (80.3 to 84.4) | 71.1 (68.7 to 73.2)                | 91.0 (90.4 to 91.5)         | 91.1 (90.5 to 91.7)         | 91.0 (90.3 to 91.7)            | 91.4 (89.2 to 93.1)                        | 90.5 (88.9 to 91.9)                                                |
|          | 175+   | 90.4 (89.2 to 91.5)            | 93.3 (91.5 to 94.7)                                                   | 75.0 (69.7 to 79.3) | 61.8 (56.1 to 66.7)                | 84.2 (82.5 to 85.7)         | 84.5 (82.7 to 86.1)         | 85.2 (83.3 to 86.8)            | 86.1 (80.3 to 90.2)                        | 84.3 (79.9 to 87.7)                                                |
| 3rd dose | 0-6    | 94.7 (93.3 to 95.9)            | 97.0 (95.4 to 98.0)                                                   | 86.7 (78.2 to 91.8) | 76.7 (64.6 to 84.7)                | 88.9 (85.7 to 91.5)         | 90.0 (86.7 to 92.5)         | 90.3 (86.8 to 92.9)            | 94.0 (83.9 to 97.8)                        | 92.7 (86.1 to 96.1)                                                |
|          | 7-13   | 98.5 (97.7 to 99.0)            | 99.3 (98.6 to 99.6)                                                   | 92.5 (83.9 to 96.5) | 86.4 (76.9 to 92.1)                | 95.0 (93.1 to 96.4)         | 94.8 (92.6 to 96.3)         | 94.7 (92.4 to 96.4)            | 95.0 (81.4 to 98.6)                        | 93.9 (87.2 to 97.1)                                                |
|          | 14-34  | 99.0 (98.6 to 99.3)            | 99.5 (99.1 to 99.7)                                                   | 95.3 (91.4 to 97.4) | 87.3 (80.9 to 91.6)                | 97.5 (96.7 to 98.2)         | 97.4 (96.4 to 98.1)         | 97.6 (96.6 to 98.3)            | 96.0 (90.4 to 98.3)                        | 95.2 (90.7 to 97.5)                                                |
|          | 35-69  | 98.5 (97.9 to 99.0)            | 99.0 (98.1 to 99.4)                                                   | 94.0 (88.0 to 97.0) | 87.4 (77.4 to 93.0)                | 96.0 (94.3 to 97.2)         | 96.1 (94.3 to 97.3)         | 96.0 (94.1 to 97.4)            | 93.2 (83.4 to 97.3)                        | 93.5 (86.2 to 97.0)                                                |
|          | 70-104 | 98.7 (95.9 to 99.6)            | 99.1 (95.5 to 99.8)                                                   | 71.8 (21.2 to 89.9) |                                    | 89.7 (75.9 to 95.6)         | 91.3 (75.4 to 96.9)         | 91.7 (76.0 to 97.1)            |                                            |                                                                    |
|          |        | <b>65+</b>                     |                                                                       |                     |                                    |                             |                             |                                |                                            |                                                                    |
| Dose 1   | 0-27   |                                |                                                                       |                     |                                    | 55.1 (35.7 to 68.7)         | 59.2 (41.1 to 71.8)         | 55.0 (33.8 to 69.4)            |                                            |                                                                    |

|          |        |                     |                     |                      |                      |                     |                     |                     |                     |                     |
|----------|--------|---------------------|---------------------|----------------------|----------------------|---------------------|---------------------|---------------------|---------------------|---------------------|
|          | 28+    | 84.5 (76.1 to 90)   | 89.8 (79.1 to 95)   | 65.4 (37.0 to 81.0)  | 40.3 (27.4 to 50.9)  | 74.7 (71.6 to 77.6) | 74.5 (71.2 to 77.4) | 74.2 (70.7 to 77.3) | 82.3 (71.7 to 89.0) | 86.7 (81.4 to 90.5) |
| Dose 2   | 0-13   | 85.1 (60.7 to 94.3) | 81.4 (26.7 to 95.3) | 66.8 (-64.5 to 93.3) | 48.3 (6.8 to 71.4)   | 82.8 (75.0 to 88.2) | 81.8 (73.3 to 87.6) | 82.7 (74.0 to 88.5) | 88.1 (64.4 to 96.0) | 89.8 (74.5 to 95.9) |
|          | 14-174 | 89.6 (86.6 to 91.9) | 89.1 (83.0 to 93.0) | 76.0 (67.0 to 82.6)  | 57.7 (52.4 to 62.4)  | 85.7 (84.7 to 86.6) | 85.6 (84.6 to 86.6) | 85.7 (84.7 to 86.7) | 90.1 (87.3 to 92.2) | 90.5 (88.6 to 92.1) |
|          | 175+   | 85.0 (80.5 to 88.5) | 85.1 (76.3 to 90.6) | 56.6 (38.8 to 69.2)  | 46.7 (39.3 to 53.1)  | 78.2 (76.6 to 79.8) | 78.3 (76.6 to 79.9) | 78.1 (76.3 to 79.7) | 83.9 (78.8 to 87.8) | 84.9 (81.5 to 87.7) |
| 3rd dose | 0-6    | 91.7 (88.3 to 94.1) | 91.9 (85.3 to 95.5) | 81.8 (66.9 to 90.0)  | 54.4 (43.1 to 63.5)  | 86.8 (84.8 to 88.5) | 86.9 (84.8 to 88.6) | 86.4 (84.2 to 88.3) | 93.5 (89.2 to 96.0) | 92.1 (88.4 to 94.6) |
|          | 7-13   | 97.3 (96.0 to 98.2) | 97.6 (95.3 to 98.8) | 77.8 (58.6 to 88.1)  | 71.3 (63.2 to 77.7)  | 88 (86.2 to 89.6)   | 88.6 (86.8 to 90.1) | 88.3 (86.4 to 90.0) | 91.6 (86.1 to 94.9) | 92.3 (88.9 to 94.7) |
|          | 14-34  | 98.9 (98.4 to 99.3) | 99.0 (98.2 to 99.4) | 90.8 (83.7 to 94.8)  | 83.9 (80.0 to 87.1)  | 96.4 (95.8 to 96.9) | 96.3 (95.7 to 96.8) | 96.1 (95.5 to 96.6) | 97.7 (96.3 to 98.5) | 97.5 (96.5 to 98.3) |
|          | 35-69  | 98.4 (97.7 to 98.9) | 98.7 (97.5 to 99.3) | 90.9 (81.1 to 95.6)  | 85.4 (80.5 to 89.1)  | 95.7 (94.9 to 96.4) | 95.7 (94.8 to 96.4) | 95.6 (94.7 to 96.3) | 96.7 (94.4 to 98.1) | 96.1 (94.0 to 97.4) |
|          | 70-104 | 97.7 (95.5 to 98.8) | 98.0 (94.6 to 99.3) |                      | 55.7 (-23.9 to 84.2) | 91.2 (85.2 to 94.8) | 90.2 (83.5 to 94.3) | 89.7 (82.1 to 94.1) | 90.0 (43.4 to 98.2) | 87.0 (58.6 to 95.9) |

*P2s: Pillar 2 symptomatic*

*P1/2: Pillar 1 and 2*

*ECDS: Emergency Care Dataset -administrative data from emergency departments. SUS: Secondary Users Service -administrative data from all secondary care which is coded on discharge.*

*ECDS All: All admissions through emergency care; ECDS Resp Coded: Respiratory SNOMED coded admission through emergency care; SUS All: Admitted with a respiratory ICD code; SUS Not Primary: Admitted with a respiratory ICD code not in the primary diagnosis field; SUS Primary: Admitted with a respiratory ICD code in the primary diagnosis field.*

*0 days, 1+ days, 2+ days, 3+ days: Length of stay, for example 1+ means at least one overnight stay*

*Vaccine effectiveness estimates are adjusted using sex, index of multiple deprivation (quintile), ethnic group, care home residence status (for age 65+), geographic region (NHS region), period (calendar week of test), health and social care worker status (for age <65), clinical risk group status (for age <65), clinically extremely vulnerable, severely immunosuppressed, and previously testing positive*

Table S5: Vaccine effectiveness against hospital admissions from emergency care (ECDS) within 14 days of the test date by the Delta and Omicron variants in symptomatic individuals 18 to 64 years of age

| <b>Omicron</b>         |        |                                                                |                 |                      |                                                                                  |                 |                     |
|------------------------|--------|----------------------------------------------------------------|-----------------|----------------------|----------------------------------------------------------------------------------|-----------------|---------------------|
|                        |        | <b>Pillar 2 symptomatic with ECDS admission within 14 days</b> |                 |                      | <b>Pillar 2 symptomatic with respiratory coded ECDS admission within 14 days</b> |                 |                     |
| <b>Interval (days)</b> |        | <b>cases</b>                                                   | <b>controls</b> | <b>VE (95% CI)</b>   | <b>cases</b>                                                                     | <b>controls</b> | <b>VE (95% CI)</b>  |
| <b>unvaccinated</b>    |        | <b>653</b>                                                     | <b>497</b>      |                      | <b>177</b>                                                                       | <b>66</b>       |                     |
| Dose 1                 | 0-27   | 28                                                             | 43              | 48.5 (12.3 to 69.7)  | 6                                                                                | 4               |                     |
|                        | 28+    | 148                                                            | 226             | 48.7 (32.8 to 60.8)  | 28                                                                               | 39              | 75.0 (50.3 to 87.4) |
| Dose 2                 | 0-13   | 13                                                             | 24              | 39.6 (-31.5 to 72.2) | 3                                                                                | 5               |                     |
|                        | 14-174 | 441                                                            | 1,111           | 54.7 (45.3 to 62.4)  | 75                                                                               | 188             | 73.7 (56.9 to 84.0) |
|                        | 175+   | 659                                                            | 968             | 34.6 (21.7 to 45.4)  | 152                                                                              | 142             | 46.5 (14.2 to 66.7) |
| 3rd dose               | 0-6    | 105                                                            | 295             | 63.9 (52.2 to 72.8)  | 18                                                                               | 50              | 76.3 (50.5 to 88.7) |
|                        | 7-13   | 88                                                             | 328             | 80.1 (73.5 to 85.1)  | 17                                                                               | 67              | 91.4 (82.7 to 95.7) |
|                        | 14-34  | 288                                                            | 1,013           | 82.4 (78.6 to 85.6)  | 52                                                                               | 148             | 91.4 (85.5 to 94.9) |
|                        | 35-69  | 584                                                            | 1,248           | 72.7 (67.2 to 77.2)  | 116                                                                              | 178             | 86.2 (77.8 to 91.5) |
|                        | 70-104 | 377                                                            | 538             | 66.9 (59.1 to 73.3)  | 100                                                                              | 69              | 79.5 (64.5 to 88.1) |
|                        | 105+   | 135                                                            | 141             | 53.6 (36.9 to 65.9)  | 38                                                                               | 17              | 60.7 (14.7 to 81.9) |
| <b>Delta</b>           |        |                                                                |                 |                      |                                                                                  |                 |                     |
| <b>Interval (days)</b> |        | <b>cases</b>                                                   | <b>controls</b> | <b>VE (95% CI)</b>   | <b>cases</b>                                                                     | <b>controls</b> | <b>VE (95% CI)</b>  |
| <b>unvaccinated</b>    |        | <b>9,170</b>                                                   | <b>2,696</b>    |                      | <b>5,447</b>                                                                     | <b>381</b>      |                     |
| Dose 1                 | 0-27   | 486                                                            | 574             | 67.1 (61.8 to 71.6)  | 262                                                                              | 81              | 69.6 (58.4 to 77.7) |
|                        | 28+    | 999                                                            | 1,868           | 85.0 (83.4 to 86.5)  | 456                                                                              | 279             | 89.2 (86.6 to 91.4) |
| Dose 2                 | 0-13   | 161                                                            | 551             | 92.8 (91.3 to 94.1)  | 76                                                                               | 78              | 94.6 (92.0 to 96.4) |
|                        | 14-174 | 4,982                                                          | 9,434           | 93.1 (92.5 to 93.6)  | 2,611                                                                            | 1,511           | 95.0 (94.1 to 95.8) |
|                        | 175+   | 1,192                                                          | 1,786           | 90.4 (89.2 to 91.5)  | 643                                                                              | 304             | 93.3 (91.5 to 94.7) |
| 3rd dose               | 0-6    | 127                                                            | 385             | 94.7 (93.3 to 95.9)  | 69                                                                               | 75              | 97.0 (95.4 to 98.0) |
|                        | 7-13   | 32                                                             | 394             | 98.5 (97.7 to 99.0)  | 13                                                                               | 85              | 99.3 (98.6 to 99.6) |
|                        | 14-34  | 43                                                             | 897             | 99.0 (98.6 to 99.3)  | 19                                                                               | 144             | 99.5 (99.1 to 99.7) |
|                        | 35-69  | 37                                                             | 694             | 98.5 (97.9 to 99.0)  | 20                                                                               | 104             | 99.0 (98.1 to 99.4) |
|                        | 70-104 | 3                                                              | 179             | 98.7 (95.9 to 99.6)  | 2                                                                                | 26              | 99.1 (95.5 to 99.8) |
|                        | 105+   | 0                                                              | 3               |                      | 0                                                                                | 2               |                     |

Vaccine effectiveness estimates are adjusted using sex, index of multiple deprivation (quintile), ethnic group, care home residence status (for age 65+), geographic region (NHS region), period (calendar week of test), health and social care worker status (for age <65), clinical risk group status (for age <65), clinically extremely vulnerable, severely immunosuppressed, and previously testing positive

Table S6: Vaccine effectiveness against hospital admissions from emergency care (ECDS) within 14 days of the test date by the Delta and Omicron variants in symptomatic individuals 18 to 64 years of age using all controls

| Omicron         |        |                                                         |                |                     |                                                                           |                |                      |
|-----------------|--------|---------------------------------------------------------|----------------|---------------------|---------------------------------------------------------------------------|----------------|----------------------|
|                 |        | Pillar 2 symptomatic with ECDS admission within 14 days |                |                     | Pillar 2 symptomatic with respiratory coded ECDS admission within 14 days |                |                      |
| Interval (days) |        | cases                                                   | controls       | VE (95% CI)         | cases                                                                     | controls       | VE (95% CI)          |
| unvaccinated    |        | <b>653</b>                                              | <b>127,778</b> |                     | <b>177</b>                                                                | <b>127,778</b> |                      |
| Dose 1          | 0-27   | 28                                                      | 9832           | 41.1 (13.8 to 59.7) | 6                                                                         | 9,832          | 50.6 (-11.9 to 78.2) |
|                 | 28+    | 148                                                     | 48,886         | 39.2 (27.0 to 49.3) | 28                                                                        | 48,886         | 58.6 (37.6 to 72.5)  |
| Dose 2          | 0-13   | 13                                                      | 7354           | 56.9 (25.2 to 75.2) | 3                                                                         | 7,354          | 60.9 (-22.7 to 87.6) |
|                 | 14-174 | 441                                                     | 440,896        | 59.3 (53.9 to 64.1) | 75                                                                        | 440,896        | 71.7 (62.5 to 78.6)  |
|                 | 175+   | 659                                                     | 212,640        | 33.4 (25.3 to 40.6) | 152                                                                       | 212,640        | 50.3 (37.5 to 60.5)  |
| 3rd dose        | 0-6    | 105                                                     | 100,217        | 67.8 (60.2 to 73.9) | 18                                                                        | 100,217        | 80.1 (67.3 to 87.9)  |
|                 | 7-13   | 88                                                      | 106,474        | 83.3 (79.0 to 86.7) | 17                                                                        | 106,474        | 88.9 (81.4 to 93.4)  |
|                 | 14-34  | 288                                                     | 281,633        | 85.5 (83.3 to 87.5) | 52                                                                        | 281,633        | 91.1 (87.7 to 93.6)  |
|                 | 35-69  | 584                                                     | 306,848        | 79.1 (76.3 to 81.5) | 116                                                                       | 306,848        | 87.7 (84.1 to 90.5)  |
|                 | 70-104 | 377                                                     | 106,966        | 70.6 (66.0 to 74.6) | 100                                                                       | 106,966        | 79.5 (72.8 to 84.6)  |
|                 | 105+   | 135                                                     | 26,052         | 60.5 (51.2 to 68.1) | 38                                                                        | 26,052         | 72.5 (58.6 to 81.8)  |
| Delta           |        |                                                         |                |                     |                                                                           |                |                      |
| Interval (days) |        | cases                                                   | controls       | VE (95% CI)         | cases                                                                     | controls       | VE (95% CI)          |
| unvaccinated    |        | <b>9170</b>                                             | <b>566,636</b> |                     | <b>5447</b>                                                               | <b>566,636</b> |                      |
| Dose 1          | 0-27   | 486                                                     | 159,118        | 74.1 (71.6 to 76.5) | 262                                                                       | 159,118        | 75.3 (71.9 to 78.3)  |
|                 | 28+    | 999                                                     | 391,467        | 86.9 (86.0 to 87.8) | 456                                                                       | 391,467        | 89.9 (88.9 to 90.9)  |
| Dose 2          | 0-13   | 161                                                     | 122309         | 94.2 (93.2 to 95.0) | 76                                                                        | 122,309        | 95.6 (94.4 to 96.5)  |
|                 | 14-174 | 4982                                                    | 2,218,985      | 94.7 (94.5 to 94.9) | 2611                                                                      | 2,218,985      | 95.7 (95.4 to 95.9)  |
|                 | 175+   | 1192                                                    | 363,447        | 92.0 (91.4 to 92.5) | 643                                                                       | 363,447        | 93.1 (92.5 to 93.7)  |
| 3rd dose        | 0-6    | 127                                                     | 117,633        | 95.9 (95.1 to 96.6) | 69                                                                        | 117,633        | 96.5 (95.6 to 97.3)  |
|                 | 7-13   | 32                                                      | 117,498        | 98.9 (98.5 to 99.2) | 13                                                                        | 117,498        | 99.3 (98.8 to 99.6)  |
|                 | 14-34  | 43                                                      | 236,845        | 99.3 (99.1 to 99.5) | 19                                                                        | 236,845        | 99.5 (99.2 to 99.7)  |
|                 | 35-69  | 37                                                      | 157,782        | 99.0 (98.6 to 99.3) | 20                                                                        | 157,782        | 99.1 (98.7 to 99.5)  |
|                 | 70-104 | 3                                                       | 47,688         | 99.3 (97.8 to 99.8) | 2                                                                         | 47,688         | 99.2 (97.0 to 99.8)  |
|                 | 105+   | 0                                                       | 333            |                     | 0                                                                         | 333            |                      |

*Vaccine effectiveness estimates are adjusted using sex, index of multiple deprivation (quintile), ethnic group, care home residence status (for age 65+), geographic region (NHS region), period (calendar week of test), health and social care worker status (for age <65), clinical risk group status (for age <65), clinically extremely vulnerable, severely immunosuppressed, and previously testing positive*

Table S7: Vaccine effectiveness against hospital admissions from emergency care (ECDS) within 14 days of the test date by the Delta and Omicron variants in symptomatic individuals 65 years of age and older

| Omicron                                                 |        |       |          |                      |                                                                           |          |                     |
|---------------------------------------------------------|--------|-------|----------|----------------------|---------------------------------------------------------------------------|----------|---------------------|
| Pillar 2 symptomatic with ECDS admission within 14 days |        |       |          |                      | Pillar 2 symptomatic with respiratory coded ECDS admission within 14 days |          |                     |
| Interval (days)                                         |        | cases | controls | VE (95% CI)          | cases                                                                     | controls | VE (95% CI)         |
| unvaccinated                                            |        | 104   | 39       |                      | 49                                                                        | 10       |                     |
| Dose 1                                                  | 0-27   | 4     | 6        |                      | 3                                                                         | 0        |                     |
|                                                         | 28+    | 17    | 13       |                      | 6                                                                         | 2        |                     |
| Dose 2                                                  | 14-174 | 13    | 25       | 77.8 (45.0 to 91.0)  | 5                                                                         | 8        | 90.6 (46.8 to 98.4) |
|                                                         | 175+   | 119   | 160      | 66.7 (43.4 to 80.4)  | 44                                                                        | 36       | 79.7 (34.4 to 93.7) |
| 3rd dose                                                | 0-6    | 9     | 40       | 85.8 (61.5 to 94.7)  | 2                                                                         | 10       | 97.3 (79.2 to 99.7) |
|                                                         | 7-13   | 6     | 56       | 92.3 (76.3 to 97.5)  | 2                                                                         | 10       | 94.8 (-7.5 to 99.8) |
|                                                         | 14-34  | 31    | 300      | 92.4 (86.0 to 95.8)  | 10                                                                        | 86       | 97.9 (92.6 to 99.4) |
|                                                         | 35-69  | 263   | 888      | 87.0 (79.2 to 91.8)  | 101                                                                       | 218      | 95.3 (87.3 to 98.3) |
|                                                         | 70-104 | 423   | 633      | 84.0 (74.6 to 89.9)  | 166                                                                       | 137      | 94.2 (84.0 to 97.9) |
|                                                         | 105+   | 185   | 157      | 76.9 (60.6 to 86.4)  | 79                                                                        | 30       | 90.3 (67.8 to 97.1) |
| Delta                                                   |        |       |          |                      |                                                                           |          |                     |
| Interval (days)                                         |        | cases | controls | VE (95% CI)          | cases                                                                     | controls | VE (95% CI)         |
| unvaccinated                                            |        | 701   | 115      |                      | 458                                                                       | 32       |                     |
| Dose 1                                                  | 0-27   | 15    | 8        | 59.2 (-12.0 to 85.1) | 8                                                                         | 0        |                     |
|                                                         | 28+    | 78    | 130      | 84.5 (76.1 to 90.0)  | 40                                                                        | 37       | 89.8 (79.1 to 95.0) |
| Dose 2                                                  | 0-13   | 7     | 82       | 85.1 (60.7 to 94.3)  | 5                                                                         | 17       | 81.4 (26.7 to 95.3) |
|                                                         | 14-174 | 2,742 | 2,831    | 89.6 (86.6 to 91.9)  | 1,634                                                                     | 690      | 89.1 (83.0 to 93.0) |
|                                                         | 175+   | 1,417 | 780      | 85.0 (80.5 to 88.5)  | 826                                                                       | 216      | 85.1 (76.3 to 90.6) |
| 3rd dose                                                | 0-6    | 168   | 172      | 91.7 (88.3 to 94.1)  | 94                                                                        | 46       | 91.9 (85.3 to 95.5) |
|                                                         | 7-13   | 57    | 172      | 97.3 (96.0 to 98.2)  | 29                                                                        | 43       | 97.6 (95.3 to 98.8) |
|                                                         | 14-34  | 63    | 583      | 98.9 (98.4 to 99.3)  | 38                                                                        | 171      | 99.0 (98.2 to 99.4) |
|                                                         | 35-69  | 68    | 864      | 98.4 (97.7 to 98.9)  | 31                                                                        | 224      | 98.7 (97.5 to 99.3) |
|                                                         | 70-104 | 15    | 322      | 97.7 (95.5 to 98.8)  | 7                                                                         | 83       | 98.0 (94.6 to 99.3) |

*Vaccine effectiveness estimates are adjusted using sex, index of multiple deprivation (quintile), ethnic group, care home residence status (for age 65+), geographic region (NHS region), period (calendar week of test), health and social care worker status (for age <65), clinical risk group status (for age <65), clinically extremely vulnerable, severely immunosuppressed, and previously testing positive*

Table S8: Vaccine effectiveness against hospital admissions from emergency care (ECDS) within 14 days of the test date by the Delta and Omicron variants in symptomatic individuals 18 to 64 years of age using all controls

|                     |        | Pillar 2 symptomatic with ECDS admission within 14 days |              |                      | Pillar 2 symptomatic with respiratory coded ECDS admission within 14 days |              |                       |
|---------------------|--------|---------------------------------------------------------|--------------|----------------------|---------------------------------------------------------------------------|--------------|-----------------------|
| Interval (days)     |        | cases                                                   | controls     | VE (95% CI)          | cases                                                                     | controls     | VE (95% CI)           |
| <b>unvaccinated</b> |        | <b>104</b>                                              | <b>1,703</b> |                      | <b>49</b>                                                                 | <b>1,703</b> |                       |
| Dose 1              | 0-27   | 4                                                       | 211          | 58.4 (-23.1 to 85.9) | 3                                                                         | 211          | 16.7 (-182.9 to 75.5) |
|                     | 28+    | 17                                                      | 640          | 62.9 (35.5 to 78.7)  | 6                                                                         | 640          | 73.8 (36.0 to 89.2)   |
| Dose 2              | 0-13   | 0                                                       | 30           |                      | 0                                                                         | 30           |                       |
|                     | 14-174 | 13                                                      | 977          | 80.8 (64.1 to 89.7)  | 5                                                                         | 977          | 86.7 (64.6 to 95.0)   |
|                     | 175+   | 119                                                     | 6,250        | 63.4 (50.5 to 72.9)  | 44                                                                        | 6,250        | 76.6 (63.0 to 85.2)   |
| 3rd dose            | 0-6    | 9                                                       | 2,117        | 81.6 (62.0 to 91.1)  | 2                                                                         | 2,117        | 93.1 (70.4 to 98.4)   |
|                     | 7-13   | 6                                                       | 3,810        | 93.6 (85.0 to 97.2)  | 2                                                                         | 3,810        | 96.0 (83.0 to 99.0)   |
|                     | 14-34  | 31                                                      | 25,524       | 95.1 (92.5 to 96.8)  | 10                                                                        | 25,524       | 97.0 (93.9 to 98.5)   |
|                     | 35-69  | 263                                                     | 67,132       | 92.7 (90.5 to 94.4)  | 101                                                                       | 67,132       | 94.6 (92.0 to 96.3)   |
|                     | 70-104 | 423                                                     | 34,337       | 90.6 (87.9 to 92.7)  | 166                                                                       | 34,337       | 92.9 (89.7 to 95.1)   |
|                     | 105+   | 185                                                     | 7,009        | 86.2 (81.2 to 89.8)  | 79                                                                        | 7,009        | 88.6 (82.1 to 92.7)   |
| <b>Delta</b>        |        |                                                         |              |                      |                                                                           |              |                       |
| Interval (days)     |        | cases                                                   | controls     | VE (95% CI)          | cases                                                                     | controls     | VE (95% CI)           |
| <b>unvaccinated</b> |        | <b>701</b>                                              | <b>4,552</b> |                      | <b>458</b>                                                                | <b>4,552</b> |                       |
| Dose 1              | 0-27   | 15                                                      | 487          | 67.2 (43.4 to 80.9)  | 8                                                                         | 487          | 70.8 (39.7 to 85.8)   |
|                     | 28+    | 78                                                      | 4,460        | 83.3 (78.5 to 87.0)  | 40                                                                        | 4,460        | 86.8 (81.4 to 90.6)   |
| Dose 2              | 0-13   | 7                                                       | 3164         | 88.9 (76.1 to 94.9)  | 5                                                                         | 3164         | 86.7 (66.9 to 94.7)   |
|                     | 14-174 | 2,742                                                   | 143,293      | 90.8 (89.8 to 91.7)  | 1,634                                                                     | 143,293      | 91.5 (90.4 to 92.5)   |
|                     | 175+   | 1,417                                                   | 38,227       | 87.6 (86.1 to 88.9)  | 826                                                                       | 38,227       | 89.1 (87.4 to 90.5)   |
| 3rd dose            | 0-6    | 168                                                     | 9,216        | 93.2 (91.7 to 94.3)  | 94                                                                        | 9,216        | 94.3 (92.7 to 95.5)   |
|                     | 7-13   | 57                                                      | 10,883       | 97.9 (97.3 to 98.5)  | 29                                                                        | 10,883       | 98.4 (97.6 to 98.9)   |
|                     | 14-34  | 63                                                      | 38,663       | 99.2 (98.9 to 99.4)  | 38                                                                        | 38,663       | 99.2 (98.9 to 99.5)   |
|                     | 35-69  | 68                                                      | 63,758       | 99.0 (98.6 to 99.2)  | 31                                                                        | 63,758       | 99.3 (98.9 to 99.5)   |
|                     | 70-104 | 15                                                      | 17,461       | 98.2 (96.8 to 99.0)  | 7                                                                         | 17,461       | 98.7 (97.1 to 99.4)   |
|                     | 105+   | 0                                                       | 65           |                      | 0                                                                         | 65           |                       |

*Vaccine effectiveness estimates are adjusted using sex, index of multiple deprivation (quintile), ethnic group, care home residence status (for age 65+), geographic region (NHS region), period (calendar week of test), health and social care worker status (for age <65), clinical risk group status (for age<65), clinically extremely vulnerable, severely immunosuppressed, and previously testing positive*

Table S9: Vaccine effectiveness using secondary care hospital admission data (SUS) by the Delta and Omicron variants in individuals 18-64 years of age

| Interval (days)<br>unvaccinated |        | Omicron                                                                                       |                 |                      | Delta         |                 |                     |
|---------------------------------|--------|-----------------------------------------------------------------------------------------------|-----------------|----------------------|---------------|-----------------|---------------------|
|                                 |        | SUS Pillar1 and 2 (0 days stay in hospital)                                                   |                 |                      |               |                 |                     |
|                                 |        | cases                                                                                         | controls        | VE (95% CI)          | cases         | controls        | VE (95% CI)         |
|                                 |        | <b>914</b>                                                                                    | <b>321</b>      |                      | <b>3,021</b>  | <b>1,444</b>    |                     |
| Dose 1                          | 0-27   | 24                                                                                            | 11              | 21.9 (-89.7 to 67.9) | 197           | 149             | 35.8 (14.8 to 51.6) |
|                                 | 28+    | 216                                                                                           | 94              | 25.0 (-9.1 to 48.5)  | 486           | 756             | 65.1 (59.0 to 70.3) |
| Dose 2                          | 0-13   | 18                                                                                            | 11              | 63.6 (-0.4 to 86.8)  | 71            | 222             | 83.4 (76.9 to 88.1) |
|                                 | 14-174 | 443                                                                                           | 318             | 46.9 (30.5 to 59.5)  | 1,604         | 3,519           | 82.5 (80.3 to 84.4) |
|                                 | 175+   | 645                                                                                           | 434             | 41.7 (25.3 to 54.5)  | 326           | 843             | 75.0 (69.7 to 79.3) |
| 3rd dose                        | 0-6    | 75                                                                                            | 83              | 62.6 (40.1 to 76.7)  | 25            | 135             | 86.7 (78.2 to 91.8) |
|                                 | 7-13   | 81                                                                                            | 90              | 75.3 (61.1 to 84.3)  | 8             | 125             | 92.5 (83.9 to 96.5) |
|                                 | 14-34  | 368                                                                                           | 301             | 72.7 (63.9 to 79.3)  | 13            | 306             | 95.3 (91.4 to 97.4) |
|                                 | 35-69  | 949                                                                                           | 434             | 62.6 (52.0 to 70.9)  | 10            | 240             | 94.0 (88.0 to 97.0) |
|                                 | 70-104 | 1,197                                                                                         | 194             | 44.8 (26.1 to 58.8)  | 5             | 66              | 71.8 (21.2 to 89.9) |
|                                 | 105+   | 696                                                                                           | 42              | 11.7 (-36.5 to 42.9) | 0             | 3               |                     |
|                                 |        | <b>SUS Pillar1 and 2 respiratory code not in primary diagnostic field but 1+ days stay</b>    |                 |                      |               |                 |                     |
|                                 |        | <b>cases</b>                                                                                  | <b>controls</b> | <b>VE (95% CI)</b>   | <b>cases</b>  | <b>controls</b> | <b>VE (95% CI)</b>  |
| <b>unvaccinated</b>             |        | <b>2,472</b>                                                                                  | <b>1,133</b>    |                      | <b>5,032</b>  | <b>5,625</b>    |                     |
| Dose 1                          | 0-27   | 64                                                                                            | 32              | 0.0 (-92.6 to 48.0)  | 200           | 424             | 40.3 (24.8 to 52.6) |
|                                 | 28+    | 530                                                                                           | 339             | 16.2 (-3.7 to 32.3)  | 876           | 3,634           | 54.7 (49.5 to 59.3) |
| Dose 2                          | 0-13   | 26                                                                                            | 14              | 8.3 (-152.9 to 66.7) | 102           | 778             | 63.2 (51.6 to 72.0) |
|                                 | 14-174 | 841                                                                                           | 666             | 29.5 (15.1 to 41.5)  | 2602          | 13,340          | 71.1 (68.7 to 73.2) |
|                                 | 175+   | 1,252                                                                                         | 1,536           | 17.8 (4.4 to 29.3)   | 486           | 3,032           | 61.8 (56.1 to 66.7) |
| 3rd dose                        | 0-6    | 83                                                                                            | 180             | 19.8 (-25.2 to 48.6) | 34            | 343             | 76.7 (64.6 to 84.7) |
|                                 | 7-13   | 88                                                                                            | 279             | 58.5 (39.3 to 71.6)  | 17            | 431             | 86.4 (76.9 to 92.1) |
|                                 | 14-34  | 512                                                                                           | 884             | 56.2 (47.3 to 63.7)  | 30            | 980             | 87.3 (80.9 to 91.6) |
|                                 | 35-69  | 960                                                                                           | 1,464           | 56.6 (49.6 to 62.7)  | 16            | 844             | 87.4 (77.4 to 93.0) |
|                                 | 70-104 | 490                                                                                           | 619             | 50.2 (40.0 to 58.7)  | 0             | 168             |                     |
|                                 | 105+   | 151                                                                                           | 162             | 50.9 (34.3 to 63.3)  | 0             | 2               |                     |
|                                 |        | <b>SUS Pillar1 and 2 at least 1 day stay and respiratory code in primary diagnostic field</b> |                 |                      |               |                 |                     |
|                                 |        | <b>cases</b>                                                                                  | <b>controls</b> | <b>VE (95% CI)</b>   | <b>cases</b>  | <b>controls</b> | <b>VE (95% CI)</b>  |
| <b>unvaccinated</b>             |        | <b>1,307</b>                                                                                  | <b>865</b>      |                      | <b>20,009</b> | <b>4,235</b>    |                     |
| Dose 1                          | 0-27   | 29                                                                                            | 33              | 40.3 (-18 to 69.8)   | 755           | 356             | 44.7 (34.3 to 53.5) |
|                                 | 28+    | 237                                                                                           | 337             | 42.8 (26.3 to 55.5)  | 1560          | 2,896           | 82.7 (81.0 to 84.3) |
| Dose 2                          | 0-13   | 7                                                                                             | 19              | 87.5 (59.5 to 96.1)  | 192           | 725             | 90.5 (88.1 to 92.5) |
|                                 | 14-174 | 214                                                                                           | 596             | 71.6 (63.4 to 77.9)  | 7571          | 12,237          | 91.0 (90.4 to 91.5) |
|                                 | 175+   | 705                                                                                           | 1,385           | 52.5 (43.3 to 60.1)  | 1946          | 2,905           | 84.2 (82.5 to 85.7) |
| 3rd dose                        | 0-6    | 45                                                                                            | 189             | 70.1 (51.8 to 81.4)  | 164           | 360             | 88.9 (85.7 to 91.5) |
|                                 | 7-13   | 40                                                                                            | 313             | 87.7 (79.9 to 92.5)  | 65            | 484             | 95.0 (93.1 to 96.4) |
|                                 | 14-34  | 194                                                                                           | 921             | 87.8 (84.3 to 90.5)  | 66            | 1,079           | 97.5 (96.7 to 98.2) |
|                                 | 35-69  | 504                                                                                           | 1,389           | 83.4 (80 to 86.2)    | 53            | 903             | 96.0 (94.3 to 97.2) |
|                                 | 70-104 | 509                                                                                           | 690             | 76.3 (70.8 to 80.7)  | 8             | 191             | 89.7 (75.9 to 95.6) |
|                                 | 105+   | 189                                                                                           | 149             | 66.3 (53.6 to 75.5)  | 0             | 1               |                     |



| unvaccinated |        | SUS Pillar1 and 2 at least 2 days stay and respiratory code in primary diagnostic field                                      |          |                      |        |          |                      |
|--------------|--------|------------------------------------------------------------------------------------------------------------------------------|----------|----------------------|--------|----------|----------------------|
|              |        | cases                                                                                                                        | controls | VE (95% CI)          | cases  | controls | VE (95% CI)          |
|              |        | 1,016                                                                                                                        | 696      |                      | 17836, | 3,473    |                      |
| Dose 1       | 0-27   | 25                                                                                                                           | 24       | 36.2 (-33.9 to 69.6) | 633    | 270      | 43.5 (31.1 to 53.6)  |
|              | 28+    | 178                                                                                                                          | 272      | 44.1 (25.6 to 58.0)  | 1,326  | 2,410    | 82.7 (80.8 to 84.4)  |
| Dose 2       | 0-13   | 5                                                                                                                            | 15       | 88.9 (58.4 to 97.0)  | 157    | 605      | 90.8 (88.0 to 92.9)  |
|              | 14-174 | 135                                                                                                                          | 430      | 69.0 (58.1 to 77.0)  | 6,543  | 10,137   | 91.1 (90.5 to 91.7)  |
|              | 175+   | 517                                                                                                                          | 1,150    | 56.1 (46.4 to 64.0)  | 1,732  | 2,438    | 84.5 (82.7 to 86.1)  |
| 3rd dose     | 0-6    | 30                                                                                                                           | 147      | 74.3 (55.9 to 85.0)  | 137    | 292      | 90.0 (86.7 to 92.5)  |
|              | 7-13   | 23                                                                                                                           | 252      | 90.9 (83.2 to 95.1)  | 58     | 394      | 94.8 (92.6 to 96.3)  |
|              | 14-34  | 134                                                                                                                          | 762      | 88.6 (84.9 to 91.5)  | 63     | 908      | 97.4 (96.4 to 98.1)  |
|              | 35-69  | 330                                                                                                                          | 1,133    | 85.8 (82.4 to 88.5)  | 47     | 745      | 96.1 (94.3 to 97.3)  |
|              | 70-104 | 310                                                                                                                          | 567      | 80.2 (74.9 to 84.4)  | 5      | 161      | 91.3 (75.4 to 96.9)  |
|              | 105+   | 124                                                                                                                          | 120      | 67.4 (53.1 to 77.4)  | 0      | 1        |                      |
| unvaccinated |        | SUS Pillar1 and 2 at least 3 days stay and respiratory code in primary diagnostic field                                      |          |                      |        |          |                      |
|              |        | cases                                                                                                                        | controls | VE (95% CI)          | cases  | controls | VE (95% CI)          |
|              |        | 804                                                                                                                          | 560      |                      | 15819  | 2,863    |                      |
| Dose 1       | 0-27   | 20                                                                                                                           | 19       | 40.0 (-40.4 to 74.4) | 525    | 213      | 46.3 (32.8 to 57.1)  |
|              | 28+    | 133                                                                                                                          | 234      | 51.5 (33.2 to 64.8)  | 1129   | 2,039    | 83.0 (80.9 to 84.8)  |
| Dose 2       | 0-13   | 5                                                                                                                            | 12       | 87.6 (53.7 to 96.7)  | 134    | 500      | 91.1 (88.2 to 93.3)  |
|              | 14-174 | 91                                                                                                                           | 338      | 72.7 (61.4 to 80.7)  | 5738   | 8,405    | 91.0 (90.3 to 91.7)  |
|              | 175+   | 391                                                                                                                          | 984      | 60.6 (50.7 to 68.5)  | 1541   | 2,074    | 85.2 (83.3 to 86.8)  |
| 3rd dose     | 0-6    | 26                                                                                                                           | 122      | 77.2 (59.5 to 87.2)  | 123    | 240      | 90.3 (86.8 to 92.9)  |
|              | 7-13   | 13                                                                                                                           | 212      | 95.0 (89.1 to 97.7)  | 52     | 334      | 94.7 (92.4 to 96.4)  |
|              | 14-34  | 96                                                                                                                           | 637      | 89.8 (85.9 to 92.6)  | 55     | 766      | 97.6 (96.6 to 98.3)  |
|              | 35-69  | 230                                                                                                                          | 937      | 87.8 (84.3 to 90.4)  | 42     | 621      | 96.0 (94.1 to 97.4)  |
|              | 70-104 | 222                                                                                                                          | 463      | 80.4 (74.5 to 85.0)  | 5      | 137      | 91.7 (76.0 to 97.1)  |
|              | 105+   | 79                                                                                                                           | 88       | 68.6 (52.3 to 79.4)  | 0      | 1        |                      |
| unvaccinated |        | SUS Pillar1 and 2 at least 2 days stay & oxygen with respiratory code in primary diagnostic field                            |          |                      |        |          |                      |
|              |        | cases                                                                                                                        | controls | VE (95% CI)          | cases  | controls | VE (95% CI)          |
|              |        | 126                                                                                                                          | 42       |                      | 3,918  | 258      |                      |
| Dose 1       | 0-27   | 1                                                                                                                            | 1        |                      | 119    | 19       | 41.4 (-14.8 to 70.1) |
|              | 28+    | 9                                                                                                                            | 18       | 87.5 (55.6 to 96.5)  | 221    | 154      | 83.3 (76.7 to 88.0)  |
| Dose 2       | 0-13   | 0                                                                                                                            | 1        |                      | 39     | 30       | 80.0 (55.7 to 91.0)  |
|              | 14-174 | 6                                                                                                                            | 18       | 79.1 (-36.9 to 96.8) | 1184   | 599      | 91.4 (89.2 to 93.1)  |
|              | 175+   | 30                                                                                                                           | 81       | 80.5 (48.7 to 92.6)  | 322    | 175      | 86.1 (80.3 to 90.2)  |
| 3rd dose     | 0-6    | 4                                                                                                                            | 7        |                      | 21     | 17       | 94.0 (83.9 to 97.8)  |
|              | 7-13   | 0                                                                                                                            | 13       |                      | 8      | 18       | 95.0 (81.4 to 98.6)  |
|              | 14-34  | 6                                                                                                                            | 43       | 94.2 (76.6 to 98.6)  | 13     | 50       | 96.0 (90.4 to 98.3)  |
|              | 35-69  | 15                                                                                                                           | 75       | 93.9 (81.6 to 97.9)  | 18     | 55       | 93.2 (83.4 to 97.3)  |
|              | 70-104 | 19                                                                                                                           | 30       | 94 (78.8 to 98.3)    | 3      | 10       |                      |
|              | 105+   | 6                                                                                                                            | 7        | 80.4 (-36.3 to 97.2) |        |          |                      |
| unvaccinated |        | SUS Pillar1 and 2 at least 2 days stay & either oxygen, ventilation or ICU with respiratory code in primary diagnostic field |          |                      |        |          |                      |
|              |        | cases                                                                                                                        | controls | VE (95% CI)          | cases  | controls | VE (95% CI)          |

| unvaccinated |        | 227 | 87  |                     | 6,511 | 505   |                     |
|--------------|--------|-----|-----|---------------------|-------|-------|---------------------|
| Dose 1       | 0-27   | 5   | 3   |                     | 174   | 34    | 51.0 (18.7 to 70.4) |
|              | 28+    | 22  | 32  | 75.0 (42.4 to 89.1) | 376   | 331   | 82.7 (78.0 to 86.4) |
| Dose 2       | 0-13   | 0   | 3   |                     | 52    | 73    | 85.0 (73.0 to 91.7) |
|              | 14-174 | 12  | 47  | 86.7 (63.6 to 95.1) | 2,090 | 1,338 | 90.5 (88.9 to 91.9) |
|              | 175+   | 67  | 172 | 82.3 (67.7 to 90.3) | 583   | 360   | 84.3 (79.9 to 87.7) |
| 3rd dose     | 0-6    | 4   | 17  | 90.7 (56 to 98.1)   | 45    | 42    | 92.7 (86.1 to 96.1) |
|              | 7-13   | 0   | 28  |                     | 18    | 51    | 93.9 (87.2 to 97.1) |
|              | 14-34  | 9   | 107 | 97.1 (92.2 to 98.9) | 23    | 118   | 95.2 (90.7 to 97.5) |
|              | 35-69  | 31  | 155 | 94.3 (88.9 to 97.1) | 22    | 107   | 93.5 (86.2 to 97.0) |
|              | 70-104 | 36  | 66  | 89.9 (78.3 to 95.3) | 4     | 21    |                     |
|              | 105+   | 11  | 12  | 75.9 (15.8 to 93.1) |       |       |                     |

*Vaccine effectiveness estimates are adjusted using sex, index of multiple deprivation (quintile), ethnic group, care home residence status (for age 65+), geographic region (NHS region), period (calendar week of test), health and social care worker status (for age <65), clinical risk group status (for age<65), clinically extremely vulnerable, severely immunosuppressed, and previously testing positive*

Table S10: Vaccine effectiveness using secondary care hospital admission data (SUS) by the Delta and Omicron variants in individuals 65 years of age and older

|                     |        | Omicron                                                                                       |            |                       | Delta        |              |                      |
|---------------------|--------|-----------------------------------------------------------------------------------------------|------------|-----------------------|--------------|--------------|----------------------|
|                     |        | SUS Pillar1 and 2 (0 days stay in hospital)                                                   |            |                       |              |              |                      |
| Interval (days)     |        | cases                                                                                         | controls   | VE (95% CI)           | cases        | controls     | VE (95% CI)          |
| <b>unvaccinated</b> |        | <b>69</b>                                                                                     | <b>60</b>  |                       | <b>104</b>   | <b>202</b>   |                      |
| Dose 1              | 0-27   | 1                                                                                             | 6          |                       | 4            | 17           |                      |
|                     | 28+    | 14                                                                                            | 25         | 67.5 (6.7 to 88.6)    | 20           | 214          | 65.4 (37.0 to 81.0)  |
| Dose 2              | 0-13   |                                                                                               |            | 55.1 (-131.8 to 91.3) | 2            | 95           | 66.8 (-64.5 to 93.3) |
|                     | 14-174 | 6                                                                                             | 13         |                       | 521          | 3,240        | 76.0 (67.0 to 82.6)  |
|                     | 175+   | 97                                                                                            | 196        | 39.2 (-6.7 to 65.4)   | 266          | 949          | 56.6 (38.8 to 69.2)  |
| 3rd dose            | 0-6    | 3                                                                                             | 43         | 85.6 (6.4 to 97.8)    | 22           | 165          | 81.8 (66.9 to 90.0)  |
|                     | 7-13   | 5                                                                                             | 36         | 69.2 (-18.7 to 92)    | 18           | 135          | 77.8 (58.6 to 88.1)  |
|                     | 14-34  | 25                                                                                            | 192        | 87.4 (72.5 to 94.2)   | 21           | 481          | 90.8 (83.7 to 94.8)  |
|                     | 35-69  | 211                                                                                           | 741        | 79.3 (65.7 to 87.5)   | 11           | 704          | 90.9 (81.1 to 95.6)  |
|                     | 70-104 | 551                                                                                           | 565        | 67.2 (46.6 to 79.8)   | 0            | 245          |                      |
|                     | 105+   | 411                                                                                           | 244        | 59.0 (30.5 to 75.8)   | 0            | 3            |                      |
|                     |        |                                                                                               |            |                       |              |              |                      |
|                     |        | <b>SUS Pillar1 and 2 respiratory code not in primary diagnostic field but 1+ days stay</b>    |            |                       |              |              |                      |
| Interval (days)     |        | cases                                                                                         | controls   | VE (95% CI)           | cases        | controls     | VE (95% CI)          |
| <b>unvaccinated</b> |        | <b>354</b>                                                                                    | <b>636</b> |                       | <b>479</b>   | <b>3,194</b> |                      |
| Dose 1              | 0-27   | 12                                                                                            | 17         |                       | 21           | 161          |                      |
|                     | 28+    | 82                                                                                            | 228        | 33.2 (5.2 to 53.0)    | 174          | 3,450        | 40.3 (27.4 to 50.9)  |
| Dose 2              | 0-13   | 0                                                                                             | 15         |                       | 13           | 1,339        | 48.3 (6.8 to 71.4)   |
|                     | 14-174 | 35                                                                                            | 273        | 66.5 (47.1 to 78.7)   | 2,765        | 43,778       | 57.7 (52.4 to 62.4)  |
|                     | 175+   | 595                                                                                           | 2,399      | 23.5 (6.4 to 37.5)    | 1,535        | 13,500       | 46.7 (39.3 to 53.1)  |
| 3rd dose            | 0-6    | 31                                                                                            | 388        | 38.9 (-2.6 to 63.6)   | 141          | 1,575        | 54.4 (43.1 to 63.5)  |
|                     | 7-13   | 33                                                                                            | 496        | 62.5 (40.7 to 76.4)   | 105          | 1,686        | 71.3 (63.2 to 77.7)  |
|                     | 14-34  | 179                                                                                           | 2,267      | 69.3 (60.8 to 76.0)   | 140          | 5,188        | 83.9 (80.0 to 87.1)  |
|                     | 35-69  | 805                                                                                           | 6,378      | 67.2 (60.5 to 72.8)   | 68           | 6,759        | 85.4 (80.5 to 89.1)  |
|                     | 70-104 | 1,718                                                                                         | 5,148      | 59.4 (51.5 to 66.0)   | 5            | 2,311        | 55.7 (-23.9 to 84.2) |
|                     | 105+   | 860                                                                                           | 1,822      | 56.3 (46.9 to 64.0)   | 0            | 22           |                      |
|                     |        | <b>SUS Pillar1 and 2 at least 1 day stay and respiratory code in primary diagnostic field</b> |            |                       |              |              |                      |
| Interval (days)     |        | cases                                                                                         | controls   | VE (95% CI)           | cases        | controls     | VE (95% CI)          |
| <b>unvaccinated</b> |        | <b>966</b>                                                                                    | <b>736</b> |                       | <b>4,374</b> | <b>3,197</b> |                      |
| Dose 1              | 0-27   | 18                                                                                            | 30         | 57.4 (-0.7 to 82)     | 79           | 200          | 55.1 (35.7 to 68.7)  |
|                     | 28+    | 146                                                                                           | 274        | 52.3 (35.8 to 64.5)   | 623          | 3,522        | 74.7 (71.6 to 77.6)  |
| Dose 2              | 0-13   | 1                                                                                             | 7          |                       | 41           | 1,373        | 82.8 (75.0 to 88.2)  |
|                     | 14-174 | 74                                                                                            | 326        | 80.5 (72.2 to 86.3)   | 10,252       | 46,368       | 85.7 (84.7 to 86.6)  |
|                     | 175+   | 972                                                                                           | 2,986      | 58.4 (51.0 to 64.7)   | 6,299        | 15,711       | 78.2 (76.6 to 79.8)  |
| 3rd dose            | 0-6    | 42                                                                                            | 562        | 78.5 (66.8 to 86.1)   | 512          | 2,109        | 86.8 (84.8 to 88.5)  |
|                     | 7-13   | 44                                                                                            | 637        | 82.2 (73.0 to 88.3)   | 401          | 2,200        | 88.0 (86.2 to 89.6)  |

|                                                                                                              |        |               |                     |                      |              |                 |                     |
|--------------------------------------------------------------------------------------------------------------|--------|---------------|---------------------|----------------------|--------------|-----------------|---------------------|
|                                                                                                              | 14-34  | 189           | 2,949               | 91.3 (89.1 to 93.0)  | 354          | 6,794           | 96.4 (95.8 to 96.9) |
|                                                                                                              | 35-69  | 892           | 8,390               | 88.9 (87.1 to 90.6)  | 208          | 9,008           | 95.7 (94.9 to 96.4) |
|                                                                                                              |        | 1,82          |                     |                      |              |                 |                     |
|                                                                                                              | 70-104 | 6             | 6,514               | 87.6 (85.6 to 89.3)  | 18           | 3,187           | 91.2 (85.2 to 94.8) |
|                                                                                                              | 105+   | 983           | 2,332               | 84.1 (81.2 to 86.5)  | 0            | 26              |                     |
| <b>SUS Pillar1 and 2 at least 2 days stay and respiratory code in primary diagnostic field</b>               |        |               |                     |                      |              |                 |                     |
| <b>Interval (days)</b>                                                                                       |        | <b>case s</b> | <b>controls</b>     | <b>VE (95% CI)</b>   | <b>cases</b> | <b>controls</b> | <b>VE (95% CI)</b>  |
| <b>unvaccinated</b>                                                                                          |        | <b>894</b>    | <b>667</b>          |                      | <b>4,198</b> | <b>2,976</b>    |                     |
| Dose 1                                                                                                       | 0-27   | 17            | 27                  | 43.9 (-41 to 77.7)   | 73           | 191             | 59.2 (41.1 to 71.8) |
|                                                                                                              | 28+    | 134           | 248                 | 53.4 (36.3 to 65.9)  | 593          | 3,263           | 74.5 (71.2 to 77.4) |
| Dose 2                                                                                                       | 0-13   | 0             | 5                   |                      | 40           | 1,253           | 81.8 (73.3 to 87.6) |
|                                                                                                              | 14-174 | 65            | 305                 | 82.3 (74.3 to 87.8)  | 9,584        | 42,489          | 85.6 (84.6 to 86.6) |
|                                                                                                              | 175+   | 913           | 2,733               | 57.7 (49.6 to 64.4)  | 5,937        | 14,482          | 78.3 (76.6 to 79.9) |
| 3rd dose                                                                                                     | 0-6    | 41            | 507                 | 77.9 (65.3 to 85.9)  | 470          | 1,893           | 86.9 (84.8 to 88.6) |
|                                                                                                              | 7-13   | 39            | 595                 | 84.7 (76.0 to 90.2)  | 362          | 2,024           | 88.6 (86.8 to 90.1) |
|                                                                                                              | 14-34  | 177           | 2,693               | 91.3 (89.1 to 93.1)  | 339          | 6,162           | 96.3 (95.7 to 96.8) |
|                                                                                                              | 35-69  | 801           | 7,616               | 89.3 (87.3 to 90.9)  | 194          | 8,199           | 95.7 (94.8 to 96.4) |
|                                                                                                              |        | 1,63          |                     |                      |              |                 |                     |
|                                                                                                              | 70-104 | 7             | 5,825               | 88.1 (86.1 to 89.9)  | 18           | 2,849           | 90.2 (83.5 to 94.3) |
|                                                                                                              | 105+   | 847           | 2,036               | 85.3 (82.4 to 87.6)  | 0            | 25              |                     |
| <b>SUS Pillar1 and 2 at least 3 days stay and respiratory code in primary diagnostic field</b>               |        |               |                     |                      |              |                 |                     |
| <b>Interval (days)</b>                                                                                       |        | <b>case s</b> | <b>controls</b>     | <b>VE (95% CI)</b>   | <b>cases</b> | <b>controls</b> | <b>VE (95% CI)</b>  |
| <b>unvaccinated</b>                                                                                          |        | <b>835</b>    | <b>603</b>          |                      | <b>3,947</b> | <b>2,753</b>    |                     |
| Dose 1                                                                                                       | 0-27   | 15            | 23                  | 35.1 (-80.6 to 76.7) | 70           | 166             | 55.0 (33.8 to 69.4) |
|                                                                                                              | 28+    | 120           | 232                 | 57.6 (41.3 to 69.3)  | 559          | 3,000           | 74.2 (70.7 to 77.3) |
| Dose 2                                                                                                       | 0-13   | 0             | 4                   |                      | 36           | 1,152           | 82.7 (74.0 to 88.5) |
|                                                                                                              | 14-174 | 61            | 281                 | 82.2 (73.7 to 87.9)  | 8,815        | 38,698          | 85.7 (84.7 to 86.7) |
|                                                                                                              | 175+   | 841           | 2,488               | 57.8 (49.4 to 64.9)  | 5,561        | 13,261          | 78.1 (76.3 to 79.7) |
| 3rd dose                                                                                                     | 0-6    | 38            | 463                 | 77.9 (64.7 to 86.2)  | 436          | 1,702           | 86.4 (84.2 to 88.3) |
|                                                                                                              | 7-13   | 38            | 552                 | 84.5 (75.5 to 90.2)  | 335          | 1,831           | 88.3 (86.4 to 90.0) |
|                                                                                                              | 14-34  | 163           | 2,416               | 91.4 (89.0 to 93.2)  | 317          | 5,536           | 96.1 (95.5 to 96.6) |
|                                                                                                              | 35-69  | 715           | 6,772               | 89.5 (87.5 to 91.2)  | 179          | 7,331           | 95.6 (94.7 to 96.3) |
|                                                                                                              |        | 1,46          |                     |                      |              |                 |                     |
|                                                                                                              | 70-104 | 9             | 5,191               | 88.6 (86.5 to 90.3)  | 16           | 2,546           | 89.7 (82.1 to 94.1) |
| 105+                                                                                                         | 724    | 1,771         | 86.4 (83.6 to 88.7) | 0                    | 22           |                 |                     |
| <b>SUS Pillar1 and 2 at least 2 days stay &amp; oxygen with respiratory code in primary diagnostic field</b> |        |               |                     |                      |              |                 |                     |
| <b>Interval (days)</b>                                                                                       |        | <b>case s</b> | <b>controls</b>     | <b>VE (95% CI)</b>   | <b>cases</b> | <b>controls</b> | <b>VE (95% CI)</b>  |
| <b>unvaccinated</b>                                                                                          |        | <b>138</b>    | <b>41</b>           |                      | <b>920</b>   | <b>163</b>      |                     |
| Dose 1                                                                                                       | 0-27   | 2             | 1                   |                      | 18           | 6               |                     |
|                                                                                                              | 28+    | 10            | 6                   | 48.3 (-169.1 to 90)  | 71           | 124             | 82.3 (71.7 to 89.0) |
| Dose 2                                                                                                       | 0-13   |               |                     |                      | 6            | 62              | 88.1 (64.4 to 96.0) |
|                                                                                                              | 14-174 | 5             | 13                  | 87.7 (50.9 to 96.9)  | 1,503        | 1,940           | 90.1 (87.3 to 92.2) |
|                                                                                                              | 175+   | 69            | 154                 | 74.0 (47.6 to 87.1)  | 893          | 694             | 83.9 (78.8 to 87.8) |

|                                                                                                                                         |        |              |     |                      |                 |       |                       |                    |  |
|-----------------------------------------------------------------------------------------------------------------------------------------|--------|--------------|-----|----------------------|-----------------|-------|-----------------------|--------------------|--|
| 3rd dose                                                                                                                                | 0-6    | 6            | 27  | 70.0 (-33.9 to 93.3) | 69              | 106   | 93.5 (89.2 to 96.0)   |                    |  |
|                                                                                                                                         | 7-13   | 3            | 31  | 86.7 (-13.9 to 98.5) | 48              | 102   | 91.6 (86.1 to 94.9)   |                    |  |
|                                                                                                                                         | 14-34  | 10           | 125 | 95.9 (89.0 to 98.4)  | 56              | 318   | 97.7 (96.3 to 98.5)   |                    |  |
|                                                                                                                                         | 35-69  | 70           | 398 | 93.9 (88.4 to 96.8)  | 39              | 446   | 96.7 (94.4 to 98.1)   |                    |  |
|                                                                                                                                         | 70-104 | 146          | 281 | 93.2 (87.5 to 96.2)  | 2               | 131   | 90.0 (43.4 to 98.2)   |                    |  |
|                                                                                                                                         | 105+   | 58           | 78  | 90.1 (79.7 to 95.2)  |                 |       |                       |                    |  |
| <b>SUS Pillar1 and 2 at least 2 days stay &amp; either oxygen, ventilation or ICU with respiratory code in primary diagnostic field</b> |        |              |     |                      |                 |       |                       |                    |  |
| <b>Interval (days)</b>                                                                                                                  |        | <b>cases</b> |     |                      | <b>controls</b> |       |                       | <b>VE (95% CI)</b> |  |
| <b>unvaccinated</b>                                                                                                                     |        | <b>215</b>   |     |                      | <b>70</b>       |       |                       | <b>1664</b>        |  |
| Dose 1                                                                                                                                  | 0-27   | 4            | 3   |                      | 27              | 14    | 24.5 (-141.3 to 76.4) |                    |  |
|                                                                                                                                         | 28+    | 16           | 16  | 78.3 (43.7 to 91.7)  | 131             | 269   | 86.7 (81.4 to 90.5)   |                    |  |
| Dose 2                                                                                                                                  | 0-13   |              |     |                      | 10              | 112   | 89.8 (74.5 to 95.9)   |                    |  |
|                                                                                                                                         | 14-174 | 7            | 30  | 90.9 (72.6 to 97.0)  | 2570            | 3,491 | 90.5 (88.6 to 92.1)   |                    |  |
|                                                                                                                                         | 175+   | 108          | 249 | 73.4 (55.1 to 84.3)  | 1494            | 1,174 | 84.9 (81.5 to 87.7)   |                    |  |
| 3rd dose                                                                                                                                | 0-6    | 6            | 37  | 89.2 (63.1 to 96.8)  | 122             | 150   | 92.1 (88.4 to 94.6)   |                    |  |
|                                                                                                                                         | 7-13   | 4            | 57  | 94.7 (71.6 to 99.0)  | 92              | 184   | 92.3 (88.9 to 94.7)   |                    |  |
|                                                                                                                                         | 14-34  | 17           | 236 | 95.8 (91.3 to 97.9)  | 89              | 543   | 97.5 (96.5 to 98.3)   |                    |  |
|                                                                                                                                         | 35-69  | 115          | 638 | 92.8 (88.4 to 95.6)  | 61              | 692   | 96.1 (94.0 to 97.4)   |                    |  |
|                                                                                                                                         | 70-104 | 220          | 467 | 92.5 (88.1 to 95.2)  | 5               | 223   | 87.0 (58.6 to 95.9)   |                    |  |
|                                                                                                                                         | 105+   | 95           | 118 | 86.8 (77.1 to 92.3)  |                 |       |                       |                    |  |

*Vaccine effectiveness estimates are adjusted using sex, index of multiple deprivation (quintile), ethnic group, care home residence status (for age 65+), geographic region (NHS region), period (calendar week of test), health and social care worker status (for age <65), clinical risk group status (for age <65), clinically extremely vulnerable, severely immunosuppressed, and previously testing positive*

Table S11: Vaccine effectiveness by manufacturer against hospital admissions from emergency care (ECDS) within 14 days of the test date by the Omicron variant in symptomatic individuals 18 to 64 years of age

| Manufacturer         | Doses               | Pillar 2 symptomatic with ECDS admission within 14 days |       |                     |                      | Pillar 2 symptomatic with respiratory coded ECDS admission within 14 days |                     |                      |
|----------------------|---------------------|---------------------------------------------------------|-------|---------------------|----------------------|---------------------------------------------------------------------------|---------------------|----------------------|
|                      |                     | Interval (days)                                         | cases | controls            | VE (95% CI)          | cases                                                                     | controls            | VE                   |
|                      |                     | unvaccinated                                            | 643   | 127,803             |                      | 171                                                                       | 127803              |                      |
| ChAdOx1-S            | Dose 1              | 0-27                                                    | 0     | 31                  |                      | 0                                                                         | 31                  |                      |
|                      |                     | 28+                                                     | 50    | 9267                | 17.6 (-10.5 to 38.5) | 14                                                                        | 9267                | 30.3 (-21.4 to 60.0) |
|                      | Dose 2              | 0-13                                                    | 0     | 223                 |                      | 0                                                                         | 223                 |                      |
|                      |                     | 14-174                                                  | 66    | 76181               | 38.5 (20.2 to 52.6)  | 15                                                                        | 76181               | 52.6 (18.7 to 72.4)  |
|                      |                     | 175+                                                    | 444   | 151244              | 31.6 (22.3 to 39.7)  | 102                                                                       | 151244              | 50.0 (35.4 to 61.3)  |
|                      | 3rd dose (any)      | 0-6                                                     | 62    | 51422               | 58.2 (45.4 to 68.0)  | 12                                                                        | 51422               | 74.1 (52.9 to 85.8)  |
|                      | 3rd dose (BNT162b2) | 7-13                                                    | 25    | 37798               | 85.2 (77.9 to 90.1)  | 9                                                                         | 37798               | 83.0 (66.4 to 91.4)  |
|                      |                     | 14-34                                                   | 121   | 110195              | 84.1 (80.5 to 87.0)  | 25                                                                        | 110195              | 89.7 (84.1 to 93.3)  |
|                      |                     | 35-69                                                   | 278   | 114444              | 76.3 (72.3 to 79.6)  | 53                                                                        | 114444              | 87.5 (82.5 to 91.0)  |
|                      |                     | 70+                                                     | 161   | 32156               | 65.6 (58.5 to 71.6)  | 51                                                                        | 32156               | 73.4 (62.3 to 81.2)  |
| 105+                 |                     | 52                                                      | 4808  | 38.2 (16.0 to 54.5) | 18                   | 4808                                                                      |                     |                      |
| 3rd dose (mRNA-1273) | 7-13                | 11                                                      | 21600 | 88.1 (78.3 to 93.5) | 0                    | 21600                                                                     |                     |                      |
|                      | 14-34               | 50                                                      | 56829 | 88.3 (84.3 to 91.3) | 5                    | 56829                                                                     | 96.2 (90.7 to 98.4) |                      |
|                      | 35-69               | 83                                                      | 43238 | 80.7 (75.5 to 84.8) | 16                   | 43238                                                                     | 88.1 (79.8 to 93.0) |                      |
|                      | 70+                 | 15                                                      | 5316  | 74.1 (56.3 to 84.7) | 1                    | 5316                                                                      |                     |                      |
| BNT162b2             | Dose 1              | 0-27                                                    | 25    | 8273                | 38.0 (7.3 to 58.5)   | 6                                                                         | 8273                | 41.7 (-32.0 to 74.3) |
|                      |                     | 28+                                                     | 88    | 35531               | 44.9 (31.0 to 56.0)  | 12                                                                        | 35531               | 70.4 (46.8 to 83.6)  |
|                      | Dose 2              | 0-13                                                    | 13    | 6607                | 52.8 (18.1 to 72.8)  | 3                                                                         | 6607                | 56.8 (-35.8 to 86.2) |
|                      |                     | 14-174                                                  | 340   | 321184              | 61.0 (55.3 to 65.9)  | 59                                                                        | 321184              | 71.7 (61.6 to 79.2)  |
|                      |                     | 175+                                                    | 207   | 60035               | 33.0 (21.3 to 42.9)  | 48                                                                        | 60035               | 48.0 (27.8 to 62.5)  |
|                      | 3rd dose (any)      | 0-6                                                     | 41    | 43987               | 73.7 (63.8 to 80.9)  | 5                                                                         | 43987               | 87.2 (68.7 to 94.8)  |
|                      | 3rd dose (BNT162b2) | 7-13                                                    | 37    | 29861               | 77.5 (68.4 to 83.9)  | 4                                                                         | 29861               | 92.5 (76.4 to 97.6)  |
|                      |                     | 14-34                                                   | 84    | 77362               | 82.8 (78.4 to 86.3)  | 17                                                                        | 77362               | 87.4 (79.2 to 92.4)  |
|                      |                     | 35-69                                                   | 183   | 119375              | 78.6 (74.6 to 82.0)  | 41                                                                        | 119375              | 86.1 (80.1 to 90.2)  |
|                      |                     | 70+                                                     | 188   | 67343               | 72.5 (67.1 to 77.0)  | 46                                                                        | 67343               | 81.8 (74.0 to 87.3)  |
| 105+                 |                     | 79                                                      | 21177 | 67.7 (58.2 to 75.0) | 19                   | 21177                                                                     |                     |                      |
| 3rd dose (mRNA-1273) | 7-13                | 8                                                       | 12923 | 88.5 (76.8 to 94.3) | 2                    | 12923                                                                     | 88.4 (53.2 to 97.1) |                      |
|                      | 14-34               | 28                                                      | 29200 | 87.3 (81.2 to 91.3) | 5                    | 29200                                                                     | 91.0 (78.1 to 96.3) |                      |
|                      | 35-69               | 32                                                      | 23649 | 84.5 (77.9 to 89.2) | 4                    | 23649                                                                     | 93.3 (81.9 to 97.5) |                      |
|                      | 70+                 | 11                                                      | 2144  | 60.6 (27.7 to 78.5) | 1                    | 2144                                                                      | 0                   |                      |

*Vaccine effectiveness estimates are adjusted using sex, index of multiple deprivation (quintile), ethnic group, care home residence status (for age 65+), geographic region (NHS region), period (calendar week of test), health and social care worker status (for age <65), clinical risk group status (for age<65), clinically extremely vulnerable, severely immunosuppressed, and previously testing positive*

Table S12: Vaccine effectiveness by manufacturer against hospital admissions from emergency care (ECDS) within 14 days of the test date by the Omicron variant in symptomatic individuals 65 years of age and older

| Manufacturer |                      | Pillar 2 symptomatic with ECDS admission within 14 days |                     |                     |                      | Pillar 2 symptomatic with respiratory coded ECDS admission within 14 days |                     |                      |                     |
|--------------|----------------------|---------------------------------------------------------|---------------------|---------------------|----------------------|---------------------------------------------------------------------------|---------------------|----------------------|---------------------|
|              |                      | Doses                                                   | Interval (days)     | cases               | controls             | VE (95% CI)                                                               | cases               | controls             | VE (95% CI)         |
|              |                      |                                                         |                     | unvaccinated        | 103                  |                                                                           | 1,705               | 49                   |                     |
| ChAdOx1-S    | Dose 1               | 0-27                                                    | 0                   | 2                   |                      | 0                                                                         | 2                   |                      |                     |
|              |                      | 28+                                                     | 10                  | 280                 |                      | 4                                                                         | 280                 |                      |                     |
|              | Dose 2               | 0-13                                                    | 0                   | 6                   |                      | 0                                                                         | 6                   |                      |                     |
|              |                      | 14-174                                                  | 5                   | 390                 | 55.3 (-20.1 to 83.3) | 2                                                                         | 390                 | 69.9 (-38.4 to 93.5) |                     |
|              | 175+                 | 88                                                      | 4,456               | 56.3 (39.6 to 68.3) | 35                   | 4,456                                                                     | 68.9 (49.7 to 80.8) |                      |                     |
|              |                      | 3rd dose (any)                                          | 0-6                 | 5                   | 1,554                | 84.8 (61.1 to 94.1)                                                       | 1                   | 1,554                | 95.1 (62.8 to 99.4) |
|              | 3rd dose (BNT162b2)  | 7-13                                                    | 3                   | 1,872               | 93.0 (77.5 to 97.8)  | 1                                                                         | 1,872               | 95.5 (67.0 to 99.4)  |                     |
|              |                      | 14-34                                                   | 21                  | 14,166              | 93.5 (89.3 to 96.0)  | 8                                                                         | 14,166              | 95.3 (89.7 to 97.8)  |                     |
|              |                      | 35-69                                                   | 137                 | 35,872              | 92.7 (90.3 to 94.6)  | 47                                                                        | 35,872              | 95.1 (92.3 to 96.8)  |                     |
|              |                      | 70+                                                     | 154                 | 14,449              | 91.0 (88.1 to 93.3)  | 60                                                                        | 14,449              | 93.3 (89.7 to 95.6)  |                     |
| 105+         | 71                   | 2,602                                                   | 82.9 (75.4 to 88.1) | 30                  | 2,602                | 85.1 (74.4 to 91.4)                                                       |                     |                      |                     |
|              | 3rd dose (mRNA-1273) | 7-13                                                    | 0                   | 811                 |                      | 0                                                                         | 811                 |                      |                     |
|              |                      | 14-34                                                   | 2                   | 3,472               | 98.1 (92.1 to 99.5)  | 1                                                                         | 3,472               | 98.1 (85.8 to 99.7)  |                     |
|              | 35-69                | 10                                                      | 3,445               | 94.9 (90.0 to 97.4) | 1                    | 3,445                                                                     | 98.9 (92.1 to 99.9) |                      |                     |
| 70+          | 5                    | 775                                                     | 89.6 (73.8 to 95.9) | 3                   | 775                  |                                                                           |                     |                      |                     |
| BNT162b2     | Dose 1               | 0-27                                                    | 2                   | 151                 | 76.1 (-8.9 to 94.7)  | 1                                                                         | 151                 |                      |                     |
|              |                      | 28+                                                     | 6                   | 324                 | 78.0 (47.7 to 90.8)  | 1                                                                         | 324                 | 93 (47.8 to 99.1)    |                     |
|              | Dose 2               | 0-13                                                    | 0                   | 22                  |                      | 0                                                                         | 22                  |                      |                     |
|              |                      | 14-174                                                  | 8                   | 569                 | 85.8 (69.4 to 93.4)  | 3                                                                         | 569                 | 90.4 (67.1 to 97.2)  |                     |
|              | 175+                 | 28                                                      | 1,792               | 75.6 (61.4 to 84.6) | 7                    | 1,792                                                                     | 89.5 (75.8 to 95.4) |                      |                     |
|              |                      | 3rd dose (any)                                          | 0-6                 | 4                   | 569                  | 72.7 (19.1 to 90.8)                                                       | 1                   | 569                  |                     |
|              | 3rd dose (BNT162b2)  | 7-13                                                    | 2                   | 882                 | 90.1 (58.6 to 97.6)  | 1                                                                         | 882                 |                      |                     |
|              |                      | 14-34                                                   | 4                   | 6,805               | 97.4 (92.8 to 99.1)  | 0                                                                         | 6,805               |                      |                     |
|              |                      | 35-69                                                   | 113                 | 26,699              | 91.7 (88.8 to 93.9)  | 51                                                                        | 26,699              | 92.8 (88.8 to 95.3)  |                     |
|              |                      | 70+                                                     | 260                 | 18,863              | 90.2 (87.2 to 92.5)  | 102                                                                       | 18,863              | 92.7 (89.1 to 95)    |                     |
| 105+         | 113                  | 4,379                                                   | 88.0 (83.4 to 91.4) | 48                  | 4,379                | 90.3 (84.3 to 94.1)                                                       |                     |                      |                     |
|              | 3rd dose (mRNA-1273) | 7-13                                                    | 1                   | 241                 | 89.0 (17.2 to 98.5)  | 0                                                                         | 241                 |                      |                     |
| 14-34        |                      | 4                                                       | 1,076               | 91.2 (75.5 to 96.9) | 1                    | 1,076                                                                     | 95.9 (69.5 to 99.5) |                      |                     |
| 35-69        | 1                    | 1,112                                                   |                     | 0                   | 1,112                |                                                                           |                     |                      |                     |
| 70+          | 0                    | 276                                                     |                     | 0                   | 276                  |                                                                           |                     |                      |                     |

Table S13: Vaccine effectiveness using secondary care hospital admission data (SUS) by manufacturer for the Omicron variant in individuals 18-64 years of age



| Manufacturer         |                      |                 | SUS Pillar1 and 2 at least 2 days stay and respiratory code in primary diagnostic field |                     |                     | SUS Pillar1 and 2 at least 2 days stay & either O2, Vent or ICU and respiratory code in primary diagnostic field |                     |                      |
|----------------------|----------------------|-----------------|-----------------------------------------------------------------------------------------|---------------------|---------------------|------------------------------------------------------------------------------------------------------------------|---------------------|----------------------|
|                      | Doses                | Interval (days) | cases                                                                                   | controls            | VE (95% CI)         | cases                                                                                                            | controls            | VE (95% CI)          |
|                      |                      | unvaccinated    | 1016                                                                                    | 696                 |                     | 227                                                                                                              | 87                  |                      |
| ChAdOx1-S            | Dose 1               | 28+             | 88                                                                                      | 153                 | 48.5 (25.7 to 64.3) | 12                                                                                                               | 23                  | 82.8 (54.3 to 93.5)  |
|                      | Dose 2               | 14-174          | 37                                                                                      | 182                 | 59.0 (31.9 to 75.3) | 0                                                                                                                | 1                   |                      |
|                      |                      | 175+            | 406                                                                                     | 877                 | 53.0 (41.7 to 62.0) | 7                                                                                                                | 25                  | 81.9 (65.7 to 90.4)  |
|                      | 3rd dose (any)       | 0-6             | 21                                                                                      | 120                 | 78.0 (59.5 to 88.1) | 4                                                                                                                | 14                  | 90.4 (53.9 to 98.0)  |
|                      | 3rd dose (BNT162b2)  | 7-13            | 13                                                                                      | 131                 | 90.2 (78.1 to 95.6) | 0                                                                                                                | 16                  |                      |
|                      |                      | 14-34           | 63                                                                                      | 415                 | 88.9 (83.8 to 92.4) | 5                                                                                                                | 58                  | 96.6 (88.7 to 99.0)  |
|                      |                      | 35-69           | 184                                                                                     | 632                 | 83.9 (79.1 to 87.5) | 19                                                                                                               | 88                  | 93.2 (85.4 to 96.9)  |
|                      |                      | 70+             | 151                                                                                     | 327                 | 82.2 (76.3 to 86.7) | 20                                                                                                               | 38                  | 90.6 (75.7 to 96.4)  |
|                      | 3rd dose (mRNA-1273) | 105+            | 61                                                                                      | 67                  | 69.0 (50.3 to 80.7) | 7                                                                                                                | 6                   |                      |
|                      |                      | 7-13            | 3                                                                                       | 59                  | 97.2 (86.1 to 99.4) | 0                                                                                                                | 3                   |                      |
| 14-34                |                      | 16              | 127                                                                                     | 93.0 (86.4 to 96.4) | 2                   | 17                                                                                                               | 96.0 (64.9 to 99.5) |                      |
| 35-69                |                      | 32              | 123                                                                                     | 89.2 (82.5 to 93.3) | 2                   | 10                                                                                                               | 95.1 (72.9 to 99.1) |                      |
|                      | 70+                  | 13              | 30                                                                                      |                     | 0                   | 3                                                                                                                |                     |                      |
| BNT162b2             | Dose 1               | 0-27            | 24                                                                                      | 21                  |                     | 4                                                                                                                | 3                   |                      |
|                      |                      | 28+             | 89                                                                                      | 110                 | 31.7 (-3.1 to 54.8) | 10                                                                                                               | 8                   |                      |
|                      | Dose 2               | 0-13            | 5                                                                                       | 12                  |                     | 0                                                                                                                | 2                   |                      |
|                      |                      | 14-174          | 89                                                                                      | 225                 | 73.8 (62.5 to 81.7) | 5                                                                                                                | 18                  | 88.7 (56.0 to 97.1)  |
|                      |                      | 175+            | 108                                                                                     | 272                 | 65.1 (51.3 to 74.9) | 10                                                                                                               | 32                  | 82.3 (45.6 to 94.2)  |
|                      | 3rd dose (any)       | 0-6             | 9                                                                                       | 27                  |                     | 0                                                                                                                | 3                   |                      |
|                      | 3rd dose (BNT162b2)  | 7-13            | 4                                                                                       | 50                  | 85.2 (47.1 to 95.8) | 0                                                                                                                | 8                   |                      |
|                      |                      | 14-34           | 44                                                                                      | 168                 | 79.7 (66.3 to 87.7) | 1                                                                                                                | 24                  | 99.5 (90.2 to 100.0) |
|                      |                      | 35-69           | 100                                                                                     | 335                 | 86.6 (81.3 to 90.4) | 10                                                                                                               | 51                  | 95.1 (86.7 to 98.2)  |
|                      |                      | 70+             | 139                                                                                     | 199                 | 79.3 (71.3 to 85.0) | 15                                                                                                               | 24                  | 88.0 (67.1 to 95.6)  |
| 3rd dose (mRNA-1273) | 105+                 | 63              | 53                                                                                      | 66.0 (44.5 to 79.2) | 4                   | 6                                                                                                                |                     |                      |
|                      | 7-13                 | 2               | 9                                                                                       |                     | 0                   | 1                                                                                                                |                     |                      |
|                      | 14-34                | 10              | 50                                                                                      | 94.3 (85.0 to 97.8) | 1                   | 8                                                                                                                |                     |                      |
|                      | 35-69                | 13              | 38                                                                                      | 89.8 (77.9 to 95.3) | 0                   | 5                                                                                                                |                     |                      |
|                      | 70+                  | 7               | 11                                                                                      |                     | 1                   | 1                                                                                                                |                     |                      |

*Vaccine effectiveness estimates are adjusted using sex, index of multiple deprivation (quintile), ethnic group, care home residence status (for age 65+), geographic region (NHS region), period (calendar week of test), health and social care worker status (for age <65), clinical risk group status (for age <65), clinically extremely vulnerable, severely immunosuppressed, and previously testing positive*

Table S14: Vaccine effectiveness using secondary care hospital admission data (SUS) by manufacturer for the Omicron variant in individuals 65 years of age and older

| Manufacturer |                      |                 | SUS Pillar1 and 2 at least 2 days stay and respiratory code in primary diagnostic field |                     |                      | SUS Pillar1 and 2 at least 2 days stay & either oxygen, ventilation or ICU with respiratory code in primary diagnostic field |                     |                     |
|--------------|----------------------|-----------------|-----------------------------------------------------------------------------------------|---------------------|----------------------|------------------------------------------------------------------------------------------------------------------------------|---------------------|---------------------|
|              | Doses                | Interval (days) | cases                                                                                   | controls            | VE (95% CI)          | cases                                                                                                                        | controls            | VE (95% CI)         |
|              |                      | unvaccinated    | 894                                                                                     | 667                 |                      | 215                                                                                                                          | 70                  |                     |
| ChAdOx1-S    | Dose 1               | 0-27            | 0                                                                                       | 2                   |                      | 0                                                                                                                            | 1                   |                     |
|              |                      | 28+             | 80                                                                                      | 164                 | 48.1 (23.5 to 64.8)  | 11                                                                                                                           | 11                  | 77.3 (29.2 to 92.7) |
|              | Dose 2               | 0-13            | 0                                                                                       | 1                   |                      |                                                                                                                              |                     |                     |
|              |                      | 14-174          | 35                                                                                      | 151                 | 71.2 (50.0 to 83.4)  | 2                                                                                                                            | 15                  |                     |
|              |                      | 175+            | 640                                                                                     | 1,815               | 53.1 (43.4 to 61.2)  | 70                                                                                                                           | 171                 | 71.4 (48.6 to 84.0) |
|              | 3rd dose (any)       | 0-6             | 30                                                                                      | 378                 | 76.7 (61.0 to 86.1)  | 4                                                                                                                            | 28                  | 92.1 (65.9 to 98.2) |
|              | 3rd dose (BNT162b 2) | 7-13            | 19                                                                                      | 322                 | 85.4 (73.4 to 92.0)  | 2                                                                                                                            | 29                  | 94.6 (36.2 to 99.5) |
|              |                      | 14-34           | 96                                                                                      | 1,536               | 91.3 (88.5 to 93.5)  | 12                                                                                                                           | 144                 | 95.0 (88.8 to 97.7) |
|              |                      | 35-69           | 464                                                                                     | 3,777               | 89.2 (87.1 to 91.0)  | 68                                                                                                                           | 315                 | 93.4 (88.8 to 96.2) |
|              |                      | 70+             | 752                                                                                     | 2,245               | 87.6 (85.2 to 89.6)  | 101                                                                                                                          | 179                 | 91.8 (86.4 to 95.1) |
|              |                      | 105+            | 240                                                                                     | 592                 | 86.1 (82.5 to 88.9)  | 25                                                                                                                           | 44                  | 92.1 (83.8 to 96.2) |
|              | 3rd dose (mRNA-1273) | 7-13            | 5                                                                                       | 66                  |                      | 0                                                                                                                            | 11                  |                     |
| 14-34        |                      | 22              | 223                                                                                     | 92.9 (87.7 to 95.9) | 1                    | 17                                                                                                                           | 99.1 (85.8 to 99.9) |                     |
| 35-69        |                      | 38              | 244                                                                                     | 92.7 (89.1 to 95.2) | 6                    | 25                                                                                                                           | 96.3 (88.5 to 98.8) |                     |
| 70+          |                      | 19              | 94                                                                                      | 91.8 (85.9 to 95.3) | 1                    | 7                                                                                                                            |                     |                     |
| BNT162b2     | Dose 1               | 0-27            | 13                                                                                      | 24                  | 54.8 (-25.3 to 83.7) | 3                                                                                                                            | 2                   |                     |
|              |                      | 28+             | 53                                                                                      | 83                  | 59.5 (35.5 to 74.6)  | 5                                                                                                                            | 5                   |                     |
|              | Dose 2               | 0-13            | 0                                                                                       | 4                   |                      |                                                                                                                              |                     |                     |
|              |                      | 14-174          | 29                                                                                      | 150                 | 87.6 (79.4 to 92.5)  | 4                                                                                                                            | 15                  | 88.9 (57.3 to 97.1) |
|              |                      | 175+            | 273                                                                                     | 918                 | 65.4 (56.6 to 72.5)  | 38                                                                                                                           | 78                  | 76.7 (52.9 to 88.5) |
|              | 3rd dose (any)       | 0-6             | 11                                                                                      | 129                 | 80.6 (54.4 to 91.7)  | 2                                                                                                                            | 9                   |                     |
|              | 3rd dose (BNT162b 2) | 7-13            | 13                                                                                      | 161                 | 86.4 (69.1 to 94.0)  | 2                                                                                                                            | 14                  | 93.2 (10.0 to 99.5) |
|              |                      | 14-34           | 51                                                                                      | 822                 | 90.0 (85.4 to 93.2)  | 4                                                                                                                            | 68                  | 95.4 (80.9 to 98.9) |
|              |                      | 35-69           | 275                                                                                     | 3467                | 88.4 (85.7 to 90.6)  | 39                                                                                                                           | 288                 | 90.1 (82.1 to 94.6) |
|              |                      | 70+             | 863                                                                                     | 3450                | 88.4 (86.2 to 90.2)  | 117                                                                                                                          | 278                 | 92.8 (88.2 to 95.7) |
|              |                      | 105+            | 607                                                                                     | 1439                | 85.2 (82.1 to 87.7)  | 70                                                                                                                           | 74                  | 83.7 (70.6 to 91.0) |
|              | 3rd dose (mRNA-1273) | 7-13            | 2                                                                                       | 45                  | 92.9 (50.2 to 99.0)  | 0                                                                                                                            | 3                   |                     |
| 14-34        |                      | 8               | 112                                                                                     | 92.9 (83.0 to 97.1) | 0                    | 7                                                                                                                            |                     |                     |
| 35-69        |                      | 24              | 128                                                                                     | 90.9 (84.8 to 94.5) | 2                    | 10                                                                                                                           |                     |                     |
| 70+          |                      | 3               | 41                                                                                      | 97.3 (90.8 to 99.2) | 1                    | 3                                                                                                                            |                     |                     |

Vaccine effectiveness estimates are adjusted using sex, index of multiple deprivation (quintile), ethnic group, care home residence status (for age 65+), geographic region (NHS region), period (calendar week of test), health and social care worker status (for age <65), clinical risk group status (for age <65), clinically extremely vulnerable, severely immunosuppressed, and previously testing positive

Table S15: SUS ICD10 and OPCS code lists

| <b>SUS Acute respiratory illness ICD10 code list</b> |                                                                       |
|------------------------------------------------------|-----------------------------------------------------------------------|
| J04*                                                 | Acute laryngitis and tracheitis                                       |
| J09*                                                 | Influenza due to identified avian influenza virus                     |
| J10*                                                 | Influenza with pneumonia, other influenza virus identified            |
| J11*                                                 | Influenza with pneumonia, virus not identified                        |
| J12*                                                 | Viral pneumonia, not elsewhere classified                             |
| J13*                                                 | Pneumonia due to Streptococcus pneumoniae                             |
| J14*                                                 | Pneumonia due to Haemophilus influenzae                               |
| J15*                                                 | Bacterial pneumonia, not elsewhere classified                         |
| J16*                                                 | Pneumonia due to other infectious organisms, not elsewhere classified |
| J17*                                                 | Pneumonia in diseases classified elsewhere                            |
| J18*                                                 | Pneumonia, organism unspecified                                       |
| J20*                                                 | Acute bronchitis                                                      |
| J21*                                                 | Acute bronchiolitis                                                   |
| J22*                                                 | Unspecified acute lower respiratory infection                         |
| J80*                                                 | ARDS (related to respiratory infection)                               |
| U071*                                                | COVID-19, virus identified                                            |
| U072*                                                | COVID-19, Virus not identified                                        |
| U04*                                                 | Severe acute respiratory syndrome [SARS]                              |
| <b>SUS OPCS-4 code list</b>                          |                                                                       |
| X52*                                                 | Oxygen use                                                            |
| E85*                                                 | Ventilation support                                                   |
| E89*                                                 | Other respiratory support                                             |

Figure S1: Flow chart demonstrating the selection of data in the study

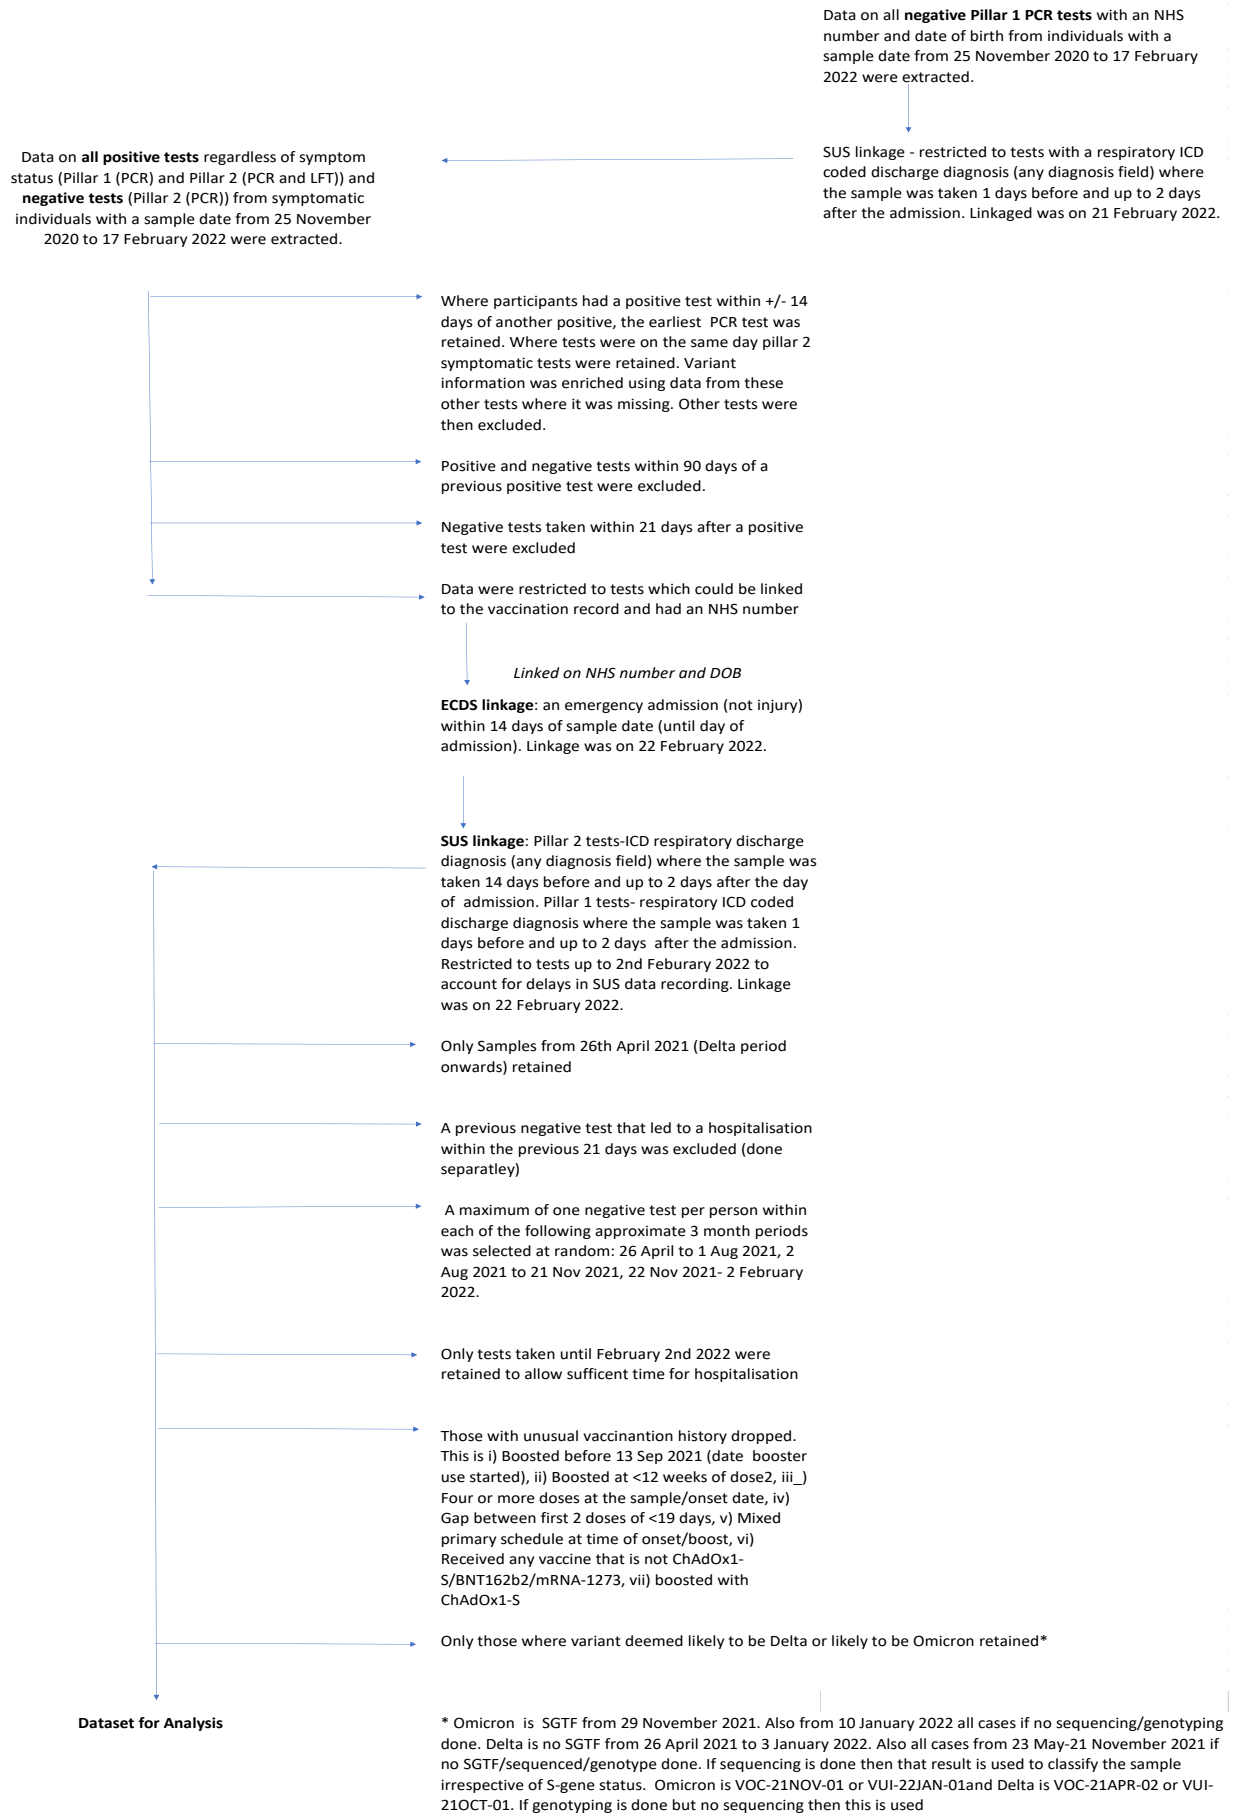

Table S16: Unadjusted\* vaccine effectiveness against different hospitalisation outcomes with Omicron by dose and interval (all vaccines combined)

|                  |          | Pillar 2s ECDS (ECDS controls) | Pillar 2s ECDS respiratory coded (ECDS respiratory controls) | Pillar 1/ 2 SUS All respiratory coded 0 days | Pillar 1/ 2 SUS Not primary respiratory coded<br>1+ days | Pillar 1/ 2 SUS primary respiratory coded<br>1+ days | Pillar 1/ 2 SUS primary respiratory coded<br>2+ days | Pillar 1/ 2 SUS primary respiratory coded<br>3+ days | Pillar 1/ 2 SUS primary respiratory coded & oxygen<br>2+ days | Pillar 1/ 2 SUS primary respiratory coded & oxygen, ventilation, or ICU<br>2+ days |
|------------------|----------|--------------------------------|--------------------------------------------------------------|----------------------------------------------|----------------------------------------------------------|------------------------------------------------------|------------------------------------------------------|------------------------------------------------------|---------------------------------------------------------------|------------------------------------------------------------------------------------|
| <b>Age 18-64</b> |          |                                |                                                              |                                              |                                                          |                                                      |                                                      |                                                      |                                                               |                                                                                    |
|                  | Interval | VE (95% CI)                    | VE (95% CI)                                                  | VE (95% CI)                                  | VE (95% CI)                                              | VE (95% CI)                                          | VE (95% CI)                                          | VE (95% CI)                                          | VE (95% CI)                                                   | VE (95% CI)                                                                        |
| Dose 1           | 0-27     | 53.8 (22.2 to 72.5)            | 64.8 (-40.3 to 91.2)                                         | 4.6 (-124.2 to 59.4)                         | -13.1 (-96.4 to 34.9)                                    | 43.7 (-4.6 to 69.7)                                  | 36.8 (-26.3 to 68.4)                                 | 37.8 (-36.2 to 71.5)                                 |                                                               |                                                                                    |
|                  | 28+      | 48.7 (33.4 to 60.5)            | 72.0 (47.3 to 85.2)                                          | 12.6 (-20.9 to 36.8)                         | 23.6 (7.6 to 36.8)                                       | 46.9 (33.6 to 57.6)                                  | 47.6 (32.4 to 59.4)                                  | 53.0 (37.4 to 64.7)                                  | 85.7 (60.1 to 94.9)                                           | 80.0 (59.4 to 90.1)                                                                |
| Dose 2           | 0-13     | 47.5 (-13.4 to 75.6)           | 70.9 (-50.2 to 94.4)                                         | 34.2 (-63.7 to 73.6)                         | -37.9 (-214.4 to 39.5)                                   | 72.2 (26.3 to 89.5)                                  | 71.6 (9.8 to 91.1)                                   | 68.7 (-4.0 to 90.6)                                  |                                                               |                                                                                    |
|                  | 14-174   | 56.0 (47.3 to 63.3)            | 75.7 (61.9 to 84.5)                                          | 15.1 (-8.2 to 33.3)                          | 4.6 (-12.5 to 19.0)                                      | 56.2 (45.3 to 64.9)                                  | 57.6 (44.6 to 67.6)                                  | 66.0 (53.5 to 75.1)                                  | 54.6 (-86.3 to 89.0)                                          | 83.3 (60.5 to 92.9)                                                                |
|                  | 175+     | 33.6 (21.1 to 44.1)            | 36.7 (2.3 to 59.0)                                           | 26.4 (8.8 to 40.5)                           | 47.7 (40.5 to 54.0)                                      | 52.8 (45.0 to 59.5)                                  | 55.9 (47.6 to 62.9)                                  | 59.5 (50.8 to 66.7)                                  | 78.1 (55.1 to 89.3)                                           | 76.7 (62.2 to 85.7)                                                                |
| 3rd dose         | 0-6      | 64.6 (53.4 to 73.1)            | 76.0 (52.1 to 87.9)                                          | 30.7 (-3.5 to 53.6)                          | 26.1 (-6.5 to 48.6)                                      | 58.5 (37.1 to 72.6)                                  | 67.4 (46.7 to 80.1)                                  | 72.0 (52.5 to 83.5)                                  | 73.0 (-37.4 to 94.7)                                          | 84.7 (39.8 to 96.1)                                                                |
|                  | 7-13     | 80.7 (74.5 to 85.4)            | 91.7 (84.1 to 95.7)                                          | 62.6 (45.5 to 74.4)                          | 65.9 (53.3 to 75.0)                                      | 81.3 (72.4 to 87.3)                                  | 86.2 (77.4 to 91.5)                                  | 91.1 (83.4 to 95.2)                                  |                                                               |                                                                                    |
|                  | 14-34    | 81.9 (78.2 to 85.0)            | 89.7 (83.4 to 93.5)                                          | 60.0 (49.6 to 68.2)                          | 69.2 (64.0 to 73.7)                                      | 83.9 (80.3 to 86.9)                                  | 85.7 (81.8 to 88.7)                                  | 87.7 (83.9 to 90.7)                                  | 93.4 (81.2 to 97.7)                                           | 96.0 (91.0 to 98.2)                                                                |
|                  | 35-69    | 70.9 (65.6 to 75.3)            | 79.3 (68.7 to 86.3)                                          | 32.7 (18.1 to 44.7)                          | 76.1 (72.9 to 78.9)                                      | 79.5 (76.1 to 82.4)                                  | 82.6 (79.2 to 85.4)                                  | 85.2 (81.9 to 88.0)                                  | 94.1 (87.4 to 97.2)                                           | 93.5 (88.9 to 96.2)                                                                |
|                  | 70-104   | 62.3 (54.5 to 68.8)            | 60.3 (36.7 to 75.0)                                          | -62.3 (-102.2 to -30.2)                      | 77.3 (73.6 to 80.5)                                      | 66.7 (60.9 to 71.6)                                  | 73.7 (68.3 to 78.3)                                  | 76.1 (70.3 to 80.7)                                  | 85.1 (67.3 to 93.2)                                           | 86.3 (76.1 to 92.2)                                                                |
|                  | 105+     | 46.4 (29.0 to 59.6)            | 28.0 (-44.8 to 64.2)                                         | -346.3 (-537.5 to -212.4)                    | 76.5 (70.0 to 81.6)                                      | 38.9 (21.7 to 52.4)                                  | 45.9 (27.8 to 59.5)                                  | 52.3 (32.7 to 66.2)                                  | 70.3 (-14.7 to 92.3)                                          | 73.2 (30.3 to 89.7)                                                                |

| Age 65+  |          |                     |                     |                       |                       |                      |                      |                      |                       |                     |
|----------|----------|---------------------|---------------------|-----------------------|-----------------------|----------------------|----------------------|----------------------|-----------------------|---------------------|
|          | Interval | VE (95% CI)         | VE (95% CI)         | VE (95% CI)           | VE (95% CI)           | VE (95% CI)          | VE (95% CI)          | VE (95% CI)          | VE (95% CI)           | VE (95% CI)         |
| Dose 1   | 0-27     |                     |                     |                       | -0.1 (-137.3 to 57.8) | 43.7 (-18.9 to 73.3) | 37.6 (-38.3 to 71.9) | 37.8 (-48.1 to 73.9) |                       |                     |
|          | 28+      |                     |                     | 51.6 (-14.1 to 79.5)  | 34.1 (8.3 to 52.7)    | 53.8 (39.1 to 64.9)  | 55.6 (40.6 to 66.8)  | 61.4 (47.7 to 71.4)  | 45.9 (-135.8 to 87.6) | 75.4 (41.2 to 89.8) |
|          | 14-174   | 74.9 (40.2 to 89.5) | 85.8 (33.9 to 97.0) | 10.4 (-243.2 to 76.6) | 64.9 (46.3 to 77.1)   | 77.8 (69.4 to 83.8)  | 80.0 (71.9 to 85.7)  | 80.4 (72.2 to 86.2)  | 85.5 (46.1 to 96.1)   | 90.9 (74.9 to 96.7) |
|          | 175+     | 60.8 (35.3 to 76.2) | 65.3 (5.2 to 87.3)  | 43.3 (5.8 to 65.8)    | 24.3 (8.3 to 37.5)    | 59.0 (52.2 to 64.8)  | 59.5 (52.4 to 65.5)  | 60.1 (52.6 to 66.3)  | 72.2 (49.1 to 84.8)   | 72.9 (56.9 to 82.9) |
| 3rd dose | 0-6      | 82.5 (55.2 to 93.1) | 94.9 (65.3 to 99.2) | 81.6 (27.9 to 95.3)   | 45.5 (12.0 to 66.2)   | 81.0 (72.0 to 87.1)  | 80.6 (71.0 to 87.0)  | 80.8 (70.8 to 87.4)  | 81.6 (36.5 to 94.7)   | 89.5 (68.6 to 96.5) |
|          | 7-13     | 91.0 (74.7 to 96.8) | 90.1 (22.8 to 98.7) | 71.7 (10.6 to 91.0)   | 68.5 (51.6 to 79.5)   | 83.7 (76.3 to 88.8)  | 85.4 (78.3 to 90.1)  | 85.5 (78.2 to 90.3)  | 86.1 (35.3 to 97.0)   | 91.2 (69.9 to 97.4) |
|          | 14-34    | 93.0 (87.5 to 96.0) | 97.3 (91.8 to 99.1) | 77.5 (57.8 to 88.0)   | 73.1 (66.2 to 78.7)   | 91.5 (89.6 to 93.1)  | 91.8 (89.8 to 93.3)  | 92.0 (89.9 to 93.6)  | 96.0 (90.5 to 98.3)   | 96.1 (92.5 to 97.9) |
|          | 35-69    | 86.8 (79.6 to 91.5) | 91.8 (80.6 to 96.6) | 68.6 (50.8 to 80.0)   | 69.1 (63.2 to 74.1)   | 88.7 (86.9 to 90.2)  | 89.4 (87.6 to 90.9)  | 89.8 (88.0 to 91.3)  | 92.4 (86.9 to 95.6)   | 91.8 (87.5 to 94.6) |
|          | 70-104   | 81.7 (71.9 to 88.1) | 88.3 (72.2 to 95.1) | 42.9 (12.0 to 63.0)   | 63.3 (56.6 to 68.9)   | 86.3 (84.3 to 88.0)  | 87.1 (85.1 to 88.8)  | 87.7 (85.8 to 89.5)  | 90.1 (83.5 to 94.0)   | 89.9 (85.0 to 93.2) |
|          | 105+     | 65.7 (43.8 to 79.0) | 72.4 (24.5 to 89.9) | 18.6 (-28.5 to 48.4)  | 61.1 (53.4 to 67.5)   | 82.6 (79.8 to 85.0)  | 84.0 (81.2 to 86.3)  | 85.2 (82.5 to 87.5)  | 87.2 (76.4 to 93.0)   | 84.3 (74.9 to 90.2) |

\*adjusted for period only

1. Andrews N, Stowe J, Kirsebom F, Toffa S, Rikeard T, Gallagher E, et al. Covid-19 Vaccine Effectiveness against the Omicron (B.1.1.529) Variant. New England Journal of Medicine. 2022.
2. NHS England. National COVID-19 and Flu Vaccination Programmes [Available from: <https://www.england.nhs.uk/contact-us/privacy-notice/national-flu-vaccination-programme/>].
3. UK Health Security Agency. Emergency department: weekly bulletins for 2021 2021 [Available from: <https://www.gov.uk/government/publications/emergency-department-weekly-bulletins-for-2021>].
